# Supplementary material
Source: PubMed Central journal article supplement (PMC8671380)
Supplement: NIHMS1753710-supplement-1.pdf [file NIHMS1753710-supplement-1.pdf]

# Polyphenol Effects on CuO-Nanoparticle-Mediated DNA Damage, Reactive Oxygen Species Generation, and Fibroblast Cell Death

Carlos Angelé-Martínez<sup>1</sup>, Fathima S. Ameer<sup>1</sup>, Yash Raval<sup>2</sup>, Guohui Huang<sup>2</sup>, Tzuen-Rong J. Tzeng<sup>2</sup>, Jeffrey N. Anker<sup>1</sup>, and Julia L. Brumaghim<sup>1,\*</sup>

<sup>1</sup>*Department of Chemistry, Clemson University, Clemson, SC 29634-0973, USA*

<sup>2</sup>*Department of Biological Sciences, Clemson University, Clemson, SC 29634, USA*

## SUPPLEMENTARY MATERIAL

**DNA gel data and IC<sub>50</sub> plots.** Gel electrophoresis images of plasmid DNA treated with various polyphenols and IC<sub>50</sub> plots are presented in Figures S1-S10. All data are the average of three independent experiments with error bars corresponding to calculated standard deviations. Data for resulting DNA band intensities are provided in Tables S1-S10. Graphs showing lack of correlation of IC<sub>50</sub> values with polyphenol oxidation potential and pK<sub>a</sub> of the first phenolic hydrogen are given in Figure S11.

**Electron paramagnetic resonance studies.** Electron paramagnetic resonance (EPR) spectra for the detection and identification of reactive oxygen species (ROS) generated by <sup>NP</sup>CuO with ascorbic acid and H<sub>2</sub>O<sub>2</sub> are shown in Figures S12 and S13. Spectra were recorded in buffered aqueous solutions (pH 6.3) at room temperature with the following experimental parameters: time constant 81.92 ms, conversion time 81.92 ms, modulation amplitude 1.00 G, microwave power 20.02, and magnetic field 3500 ± 100 G, unless otherwise indicated.

**Dynamic light scattering measurements.** Dynamic light scattering (DLS) measurements of <sup>NP</sup>CuO and washed CuO nanoparticles (<sup>w</sup>CuO) in water and Eagle's minimum essential medium (EMEM) are presented in Table S11 and Figure S14. Data are reported as means of at least three trials with standard deviations for the errors.

**Cell data and EC<sub>50</sub> plots.** Cell viability data and EC<sub>50</sub> plots of L929 cells treated with <sup>NP</sup>CuO, washed CuO nanoparticles (<sup>w</sup>CuO), <sup>NP</sup>CuO supernatant with dissolved copper removed (<sup>l</sup>CuO), and dissolved copper (CuCl<sub>2</sub>) solutions with or without H<sub>2</sub>O<sub>2</sub>, MEPCA, and MEGA for 24 h are presented in Figures S15-S22 and Tables S12-S19. EC<sub>50</sub> values are reported with standard deviations for the errors and were calculated by fitting all points of four trials with a single curve.

**Table S1.** DNA damage inhibition by methyl-3,4-dihydroxybenzoate (MEPCA; 0.5 – 800  $\mu\text{M}$ ) with  $^{64}\text{CuO}$  (500  $\mu\text{M}$ ) and  $\text{H}_2\text{O}_2$  (50  $\mu\text{M}$ ) at pH 7 for 150 min.

| Gel lane | Contents                                                                                | [MEPCA] ( $\mu\text{M}$ ) | % Supercoiled DNA | % Nicked DNA   | <i>p</i> Value |
|----------|-----------------------------------------------------------------------------------------|---------------------------|-------------------|----------------|----------------|
| 1        | plasmid (p)                                                                             | 0                         | 97.3 $\pm$ 1.4    | 2.7 $\pm$ 1.4  | -              |
| 2        | p + $\text{H}_2\text{O}_2$ (50 $\mu\text{M}$ )                                          | 0                         | 95.1 $\pm$ 1.8    | 4.9 $\pm$ 1.8  | -              |
| 3        | p + MEPCA (800 $\mu\text{M}$ )                                                          | 800                       | 95.7 $\pm$ 1.3    | 4.3 $\pm$ 1.3  | -              |
| 4        | p + $^{64}\text{CuO}$ (500 $\mu\text{M}$ ) + $\text{H}_2\text{O}_2$ (50 $\mu\text{M}$ ) | 0                         | 9.3 $\pm$ 6.1     | 90.7 $\pm$ 6.1 | -              |
| 5        | p + $^{64}\text{CuO}$ + $\text{H}_2\text{O}_2$ + MEPCA                                  | 0.5                       | 17.0 $\pm$ 4.5    | 83.0 $\pm$ 4.5 | 0.0975         |
| 6        | p + $^{64}\text{CuO}$ + $\text{H}_2\text{O}_2$ + MEPCA                                  | 1                         | 31.7 $\pm$ 3.2    | 68.3 $\pm$ 3.2 | 0.0067         |
| 7        | p + $^{64}\text{CuO}$ + $\text{H}_2\text{O}_2$ + MEPCA                                  | 2                         | 34.0 $\pm$ 2.6    | 66.0 $\pm$ 2.6 | 0.0037         |
| 8        | p + $^{64}\text{CuO}$ + $\text{H}_2\text{O}_2$ + MEPCA                                  | 5                         | 43.5 $\pm$ 4.0    | 56.5 $\pm$ 4.0 | 0.0045         |
| 9        | p + $^{64}\text{CuO}$ + $\text{H}_2\text{O}_2$ + MEPCA                                  | 10                        | 66.5 $\pm$ 4.7    | 33.5 $\pm$ 4.7 | 0.0022         |
| 10       | p + $^{64}\text{CuO}$ + $\text{H}_2\text{O}_2$ + MEPCA                                  | 25                        | 83.6 $\pm$ 0.8    | 16.4 $\pm$ 0.8 | <0.0001        |
| 11       | p + $^{64}\text{CuO}$ + $\text{H}_2\text{O}_2$ + MEPCA                                  | 50                        | 86.8 $\pm$ 3.3    | 13.2 $\pm$ 3.3 | 0.0006         |
| 12       | p + $^{64}\text{CuO}$ + $\text{H}_2\text{O}_2$ + MEPCA                                  | 100                       | 92.8 $\pm$ 2.4    | 7.2 $\pm$ 2.4  | 0.0003         |
| 13       | p + $^{64}\text{CuO}$ + $\text{H}_2\text{O}_2$ + MEPCA                                  | 200                       | 95.4 $\pm$ 2.4    | 4.6 $\pm$ 2.4  | 0.0003         |
| 14       | p + $^{64}\text{CuO}$ + $\text{H}_2\text{O}_2$ + MEPCA                                  | 400                       | 98.9 $\pm$ 0.9    | 1.1 $\pm$ 0.9  | <0.0001        |
| 15       | p + $^{64}\text{CuO}$ + $\text{H}_2\text{O}_2$ + MEPCA                                  | 800                       | 99.9 $\pm$ 0.1    | 0.1 $\pm$ 0.1  | <0.0001        |

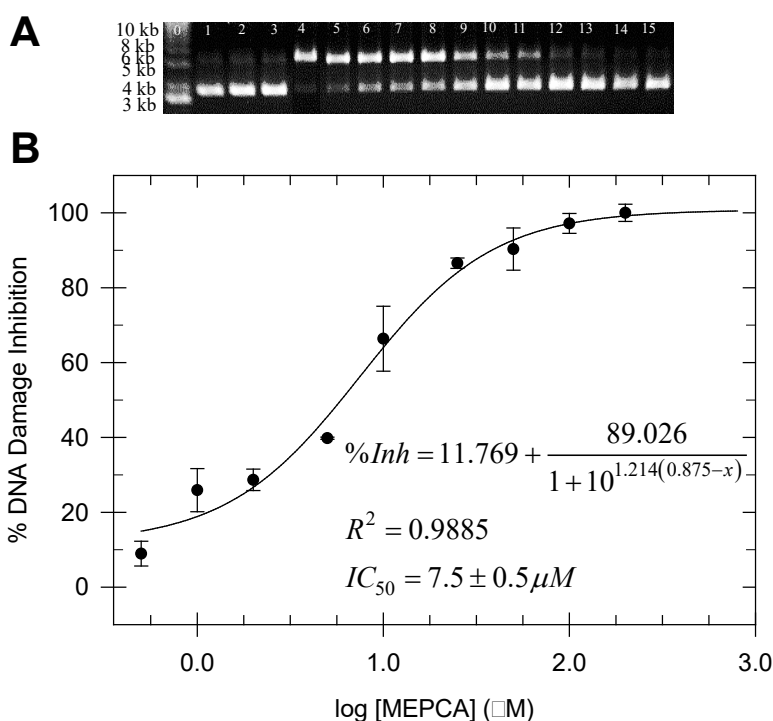

**Figure S1.** (A) Gel electrophoresis image of DNA treated with  $^{64}\text{CuO}$  (500  $\mu\text{M}$ ),  $\text{H}_2\text{O}_2$  (50  $\mu\text{M}$ ), and MEPCA (0.5 – 800  $\mu\text{M}$ ) at pH 7 (MOPS buffer) for 150 min. Lane 0: 1 kb molecular weight ladder; lane 1: plasmid (p); lane 2: p +  $\text{H}_2\text{O}_2$  (50  $\mu\text{M}$ ); lane 3: p + MEPCA (800  $\mu\text{M}$ ); lane 4: p +  $^{64}\text{CuO}$  (500  $\mu\text{M}$ ) +  $\text{H}_2\text{O}_2$  (50  $\mu\text{M}$ ); lanes 5-15: p +  $^{64}\text{CuO}$  (500  $\mu\text{M}$ ) + increasing concentrations of MEPCA (0.5, 1, 2, 5, 10, 25, 50, 100, 200, 400, and 800  $\mu\text{M}$ , respectively) and  $\text{H}_2\text{O}_2$  (50  $\mu\text{M}$ ). (B) Percentage of DNA damage inhibition with respect to MEPCA concentration in the presence of  $^{64}\text{CuO}$  and  $\text{H}_2\text{O}_2$ .

**Table S2.** DNA damage inhibition by propyl gallate (PREGA; 0.5 – 800  $\mu\text{M}$ ) with  $^{\text{NP}}\text{CuO}$  (500  $\mu\text{M}$ ) and  $\text{H}_2\text{O}_2$  (50  $\mu\text{M}$ ) at pH 7 for 150 min.

| Gel lane | Contents                                                                                       | [PREGA] ( $\mu\text{M}$ ) | % Supercoiled DNA | % Nicked DNA   | <i>p</i> Value |
|----------|------------------------------------------------------------------------------------------------|---------------------------|-------------------|----------------|----------------|
| 1        | plasmid (p)                                                                                    | 0                         | 99.7 $\pm$ 0.0    | 0.3 $\pm$ 0.0  | -              |
| 2        | p + $\text{H}_2\text{O}_2$ (50 $\mu\text{M}$ )                                                 | 0                         | 98.3 $\pm$ 0.3    | 1.7 $\pm$ 0.3  | -              |
| 3        | p + PREGA (800 $\mu\text{M}$ )                                                                 | 1200                      | 93.3 $\pm$ 3.1    | 6.7 $\pm$ 3.1  | -              |
| 4        | p + $^{\text{NP}}\text{CuO}$ (500 $\mu\text{M}$ ) + $\text{H}_2\text{O}_2$ (50 $\mu\text{M}$ ) | 0                         | 2.9 $\pm$ 5.0     | 97.1 $\pm$ 5.0 | -              |
| 5        | p + $^{\text{NP}}\text{CuO}$ + $\text{H}_2\text{O}_2$ + PREGA                                  | 0.5                       | 5.5 $\pm$ 5.4     | 94.5 $\pm$ 5.4 | 0.492          |
| 6        | p + $^{\text{NP}}\text{CuO}$ + $\text{H}_2\text{O}_2$ + PREGA                                  | 1                         | 4.6 $\pm$ 3.0     | 95.4 $\pm$ 3.0 | 0.4298         |
| 7        | p + $^{\text{NP}}\text{CuO}$ + $\text{H}_2\text{O}_2$ + PREGA                                  | 2                         | 2.1 $\pm$ 2.9     | 97.9 $\pm$ 2.9 | 0.6799         |
| 8        | p + $^{\text{NP}}\text{CuO}$ + $\text{H}_2\text{O}_2$ + PREGA                                  | 5                         | 3.1 $\pm$ 4.6     | 96.9 $\pm$ 4.6 | 0.9468         |
| 9        | p + $^{\text{NP}}\text{CuO}$ + $\text{H}_2\text{O}_2$ + PREGA                                  | 10                        | 5.5 $\pm$ 4.2     | 94.5 $\pm$ 4.2 | 0.3958         |
| 10       | p + $^{\text{NP}}\text{CuO}$ + $\text{H}_2\text{O}_2$ + PREGA                                  | 25                        | 5.9 $\pm$ 5.1     | 94.1 $\pm$ 5.1 | 0.4155         |
| 11       | p + $^{\text{NP}}\text{CuO}$ + $\text{H}_2\text{O}_2$ + PREGA                                  | 50                        | 37.5 $\pm$ 3.2    | 62.5 $\pm$ 3.2 | 0.0028         |
| 12       | p + $^{\text{NP}}\text{CuO}$ + $\text{H}_2\text{O}_2$ + PREGA                                  | 100                       | 45.8 $\pm$ 6.9    | 54.2 $\pm$ 6.9 | 0.0085         |
| 13       | p + $^{\text{NP}}\text{CuO}$ + $\text{H}_2\text{O}_2$ + PREGA                                  | 200                       | 66.3 $\pm$ 9.6    | 33.7 $\pm$ 9.6 | 0.0076         |
| 14       | p + $^{\text{NP}}\text{CuO}$ + $\text{H}_2\text{O}_2$ + PREGA                                  | 400                       | 78.8 $\pm$ 1.4    | 21.2 $\pm$ 1.4 | 0.0001         |
| 15       | p + $^{\text{NP}}\text{CuO}$ + $\text{H}_2\text{O}_2$ + PREGA                                  | 800                       | 89.0 $\pm$ 1.7    | 11.0 $\pm$ 1.7 | 0.0001         |
| 16       | p + $^{\text{NP}}\text{CuO}$ + $\text{H}_2\text{O}_2$ + PREGA                                  | 1200                      | 96.4 $\pm$ 0.9    | 3.6 $\pm$ 0.9  | <0.0001        |

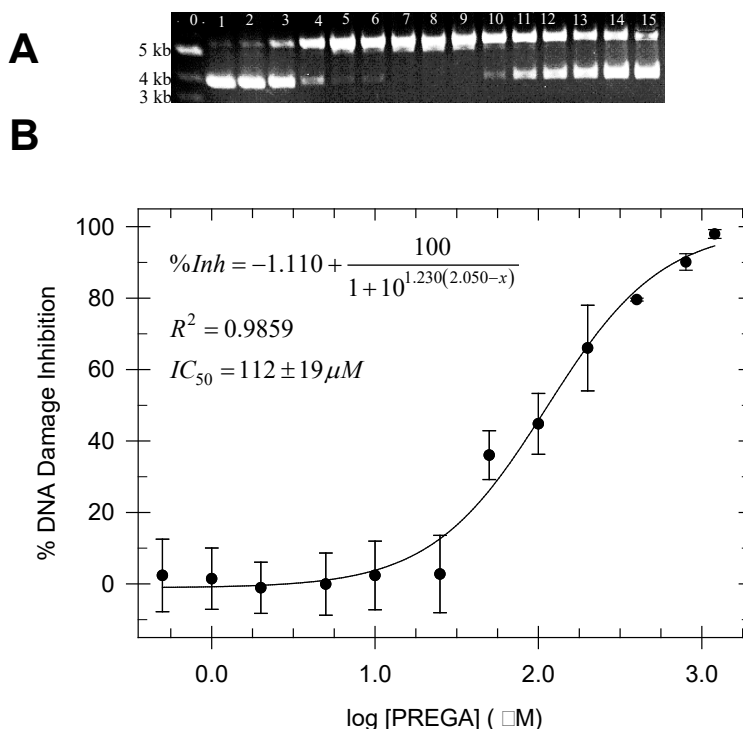

**Figure S2.** (A) Gel electrophoresis image of DNA treated with  $^{\text{NP}}\text{CuO}$  (500  $\mu\text{M}$ ),  $\text{H}_2\text{O}_2$  (50  $\mu\text{M}$ ), and PREGA (0.5 – 1200  $\mu\text{M}$ ) at pH 7 (MOPS buffer) for 150 min. Lane 0: 1 kb molecular weight ladder; lane 1: plasmid (p); lane 2: p +  $\text{H}_2\text{O}_2$  (50  $\mu\text{M}$ ); lane 3: p + PREGA (800  $\mu\text{M}$ ); lane 4: p +  $^{\text{NP}}\text{CuO}$  (500  $\mu\text{M}$ ) +  $\text{H}_2\text{O}_2$  (50  $\mu\text{M}$ ); lanes 5-15: p +  $^{\text{NP}}\text{CuO}$  (500  $\mu\text{M}$ ) + increasing concentrations of PREGA (0.5, 1, 2, 5, 10, 25, 50, 100, 200, 400, 800, and 1200  $\mu\text{M}$ , respectively) and  $\text{H}_2\text{O}_2$  (50  $\mu\text{M}$ ). (B) Percentage of DNA damage inhibition with respect to PREGA concentration in the presence of  $^{\text{NP}}\text{CuO}$  and  $\text{H}_2\text{O}_2$ .

**Table S3.** DNA damage inhibition by epicatechin gallate (ECG; 0.5 – 1200  $\mu\text{M}$ ) with  $^{64}\text{NiCuO}$  (500  $\mu\text{M}$ ) and  $\text{H}_2\text{O}_2$  (50  $\mu\text{M}$ ) at pH 7 for 150 min.

| Gel lane | Contents                                                                                  | [ECG] ( $\mu\text{M}$ ) | % Supercoiled DNA | % Nicked DNA   | <i>p</i> Value |
|----------|-------------------------------------------------------------------------------------------|-------------------------|-------------------|----------------|----------------|
| 1        | plasmid (p)                                                                               | 0                       | 97.5 $\pm$ 4.4    | 2.5 $\pm$ 4.4  | -              |
| 2        | p + $\text{H}_2\text{O}_2$ (50 $\mu\text{M}$ )                                            | 0                       | 96.2 $\pm$ 2.9    | 3.8 $\pm$ 2.9  | -              |
| 3        | p + ECG (800 $\mu\text{M}$ )                                                              | 1200                    | 93.2 $\pm$ 4.4    | 6.8 $\pm$ 4.4  | -              |
| 4        | p + $^{64}\text{NiCuO}$ (500 $\mu\text{M}$ ) + $\text{H}_2\text{O}_2$ (50 $\mu\text{M}$ ) | 0                       | 0.5 $\pm$ 0.4     | 99.5 $\pm$ 0.4 | -              |
| 5        | p + $^{64}\text{NiCuO}$ + $\text{H}_2\text{O}_2$ + ECG                                    | 0.5                     | 0.7 $\pm$ 1.2     | 99.3 $\pm$ 1.2 | 0.8            |
| 6        | p + $^{64}\text{NiCuO}$ + $\text{H}_2\text{O}_2$ + ECG                                    | 1                       | 0.1 $\pm$ 0.1     | 99.9 $\pm$ 0.1 | 0.0202         |
| 7        | p + $^{64}\text{NiCuO}$ + $\text{H}_2\text{O}_2$ + ECG                                    | 2                       | 0.1 $\pm$ 0.1     | 99.9 $\pm$ 0.1 | 0.0202         |
| 8        | p + $^{64}\text{NiCuO}$ + $\text{H}_2\text{O}_2$ + ECG                                    | 5                       | 0.1 $\pm$ 0.0     | 99.9 $\pm$ 0.0 | >0.9999        |
| 9        | p + $^{64}\text{NiCuO}$ + $\text{H}_2\text{O}_2$ + ECG                                    | 10                      | 2.5 $\pm$ 2.7     | 97.5 $\pm$ 2.7 | 0.3281         |
| 10       | p + $^{64}\text{NiCuO}$ + $\text{H}_2\text{O}_2$ + ECG                                    | 25                      | 4.3 $\pm$ 3.4     | 95.7 $\pm$ 3.4 | 0.1925         |
| 11       | p + $^{64}\text{NiCuO}$ + $\text{H}_2\text{O}_2$ + ECG                                    | 50                      | 26.8 $\pm$ 6.0    | 73.2 $\pm$ 6.0 | 0.0169         |
| 12       | p + $^{64}\text{NiCuO}$ + $\text{H}_2\text{O}_2$ + ECG                                    | 100                     | 43.6 $\pm$ 4.3    | 56.4 $\pm$ 4.3 | 0.0033         |
| 13       | p + $^{64}\text{NiCuO}$ + $\text{H}_2\text{O}_2$ + ECG                                    | 200                     | 51.7 $\pm$ 4.4    | 48.3 $\pm$ 4.4 | 0.0025         |
| 14       | p + $^{64}\text{NiCuO}$ + $\text{H}_2\text{O}_2$ + ECG                                    | 400                     | 68.2 $\pm$ 4.3    | 31.8 $\pm$ 4.3 | 0.0013         |
| 15       | p + $^{64}\text{NiCuO}$ + $\text{H}_2\text{O}_2$ + ECG                                    | 800                     | 75.9 $\pm$ 2.2    | 24.1 $\pm$ 2.2 | 0.0003         |
| 16       | p + $^{64}\text{NiCuO}$ + $\text{H}_2\text{O}_2$ + ECG                                    | 1200                    | 85.4 $\pm$ 2.4    | 14.6 $\pm$ 2.4 | 0.0003         |

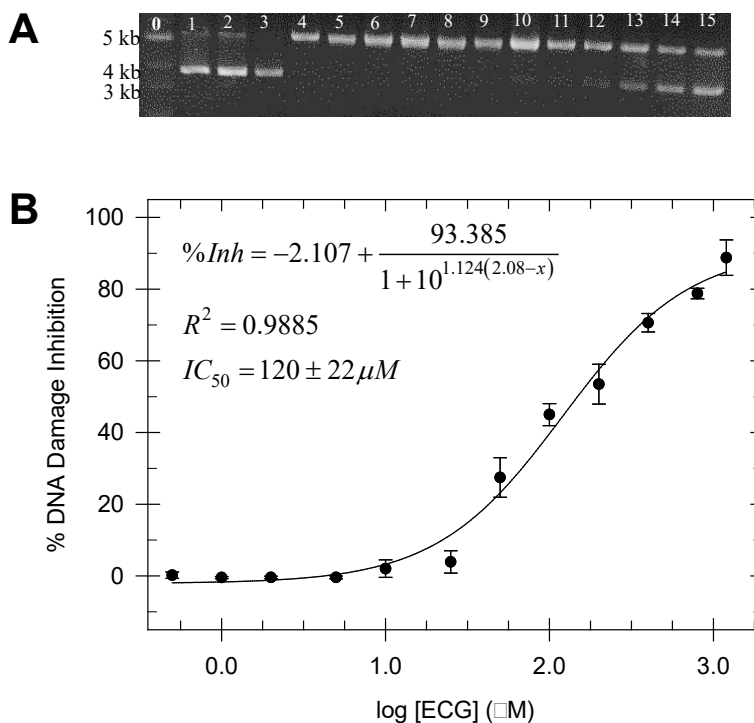

**Figure S3.** (A) Gel electrophoresis image of DNA treated with  $^{64}\text{NiCuO}$  (500  $\mu\text{M}$ ),  $\text{H}_2\text{O}_2$  (50  $\mu\text{M}$ ), and ECG (0.5 – 1200  $\mu\text{M}$ ) at pH 7 (MOPS buffer) for 150 min. Lane 0: 1 kb molecular weight ladder; lane 1: plasmid (p); lane 2: p +  $\text{H}_2\text{O}_2$  (50  $\mu\text{M}$ ); lane 3: p + ECG (1200  $\mu\text{M}$ ); lane 4: p +  $^{64}\text{NiCuO}$  (500  $\mu\text{M}$ ) +  $\text{H}_2\text{O}_2$  (50  $\mu\text{M}$ ); lanes 5 -16: p +  $^{64}\text{NiCuO}$  (500  $\mu\text{M}$ ) + increasing concentrations of ECG (0.5, 1, 2, 5, 10, 25, 50, 100, 200, 400, 800, and 1200  $\mu\text{M}$ , respectively) and  $\text{H}_2\text{O}_2$  (50  $\mu\text{M}$ ). (B) Percentage of DNA damage inhibition with respect to ECG concentration in the presence of  $^{64}\text{NiCuO}$  and  $\text{H}_2\text{O}_2$ .

**Table S4.** DNA damage inhibition by methyl-3,4,5-trihydroxybenzoate (MEGA; 0.5 – 800  $\mu\text{M}$ ) with  $^{\text{NP}}\text{CuO}$  (500  $\mu\text{M}$ ) and  $\text{H}_2\text{O}_2$  (50  $\mu\text{M}$ ) at pH 7 for 150 min.

| Gel lane | Contents                                                                                       | [MEGA] ( $\mu\text{M}$ ) | % Supercoiled DNA | % Nicked DNA   | <i>p</i> Value |
|----------|------------------------------------------------------------------------------------------------|--------------------------|-------------------|----------------|----------------|
| 1        | plasmid (p)                                                                                    | 0                        | 96.6 $\pm$ 2.5    | 3.4 $\pm$ 2.5  | -              |
| 2        | p + $\text{H}_2\text{O}_2$ (50 $\mu\text{M}$ )                                                 | 0                        | 96.1 $\pm$ 1.3    | 3.9 $\pm$ 1.3  | -              |
| 3        | p + MEGA (800 $\mu\text{M}$ )                                                                  | 800                      | 96.4 $\pm$ 1.1    | 3.6 $\pm$ 1.1  | -              |
| 4        | p + $^{\text{NP}}\text{CuO}$ (500 $\mu\text{M}$ ) + $\text{H}_2\text{O}_2$ (50 $\mu\text{M}$ ) | 0                        | 5.3 $\pm$ 2.9     | 94.7 $\pm$ 2.9 | -              |
| 5        | p + $^{\text{NP}}\text{CuO}$ + $\text{H}_2\text{O}_2$ + MEGA                                   | 0.5                      | 10.1 $\pm$ 5.3    | 89.9 $\pm$ 5.3 | 0.2573         |
| 6        | p + $^{\text{NP}}\text{CuO}$ + $\text{H}_2\text{O}_2$ + MEGA                                   | 1                        | 4.5 $\pm$ 3.4     | 95.5 $\pm$ 3.4 | 0.7231         |
| 7        | p + $^{\text{NP}}\text{CuO}$ + $\text{H}_2\text{O}_2$ + MEGA                                   | 2                        | 1.8 $\pm$ 2.9     | 98.2 $\pm$ 2.9 | 0.1717         |
| 8        | p + $^{\text{NP}}\text{CuO}$ + $\text{H}_2\text{O}_2$ + MEGA                                   | 5                        | 0.1 $\pm$ 0.1     | 99.9 $\pm$ 0.1 | 0.0001         |
| 9        | p + $^{\text{NP}}\text{CuO}$ + $\text{H}_2\text{O}_2$ + MEGA                                   | 10                       | 0.2 $\pm$ 0.1     | 99.8 $\pm$ 0.1 | 0.0001         |
| 10       | p + $^{\text{NP}}\text{CuO}$ + $\text{H}_2\text{O}_2$ + MEGA                                   | 25                       | 1.0 $\pm$ 0.8     | 99.0 $\pm$ 0.8 | 0.0113         |
| 11       | p + $^{\text{NP}}\text{CuO}$ + $\text{H}_2\text{O}_2$ + MEGA                                   | 50                       | 16.0 $\pm$ 4.5    | 84.0 $\pm$ 4.5 | 0.0542         |
| 12       | p + $^{\text{NP}}\text{CuO}$ + $\text{H}_2\text{O}_2$ + MEGA                                   | 100                      | 35.8 $\pm$ 2.2    | 64.2 $\pm$ 2.2 | 0.0017         |
| 13       | p + $^{\text{NP}}\text{CuO}$ + $\text{H}_2\text{O}_2$ + MEGA                                   | 200                      | 51.5 $\pm$ 0.8    | 48.5 $\pm$ 0.8 | <0.0001        |
| 14       | p + $^{\text{NP}}\text{CuO}$ + $\text{H}_2\text{O}_2$ + MEGA                                   | 400                      | 74.9 $\pm$ 3.7    | 25.1 $\pm$ 3.7 | 0.0009         |
| 15       | p + $^{\text{NP}}\text{CuO}$ + $\text{H}_2\text{O}_2$ + MEGA                                   | 800                      | 86.9 $\pm$ 1.9    | 13.1 $\pm$ 1.9 | 0.0002         |
| 16       | p + $^{\text{NP}}\text{CuO}$ + $\text{H}_2\text{O}_2$ + MEGA                                   | 1200                     | 97.2 $\pm$ 2.2    | 2.8 $\pm$ 2.2  | 0.0002         |

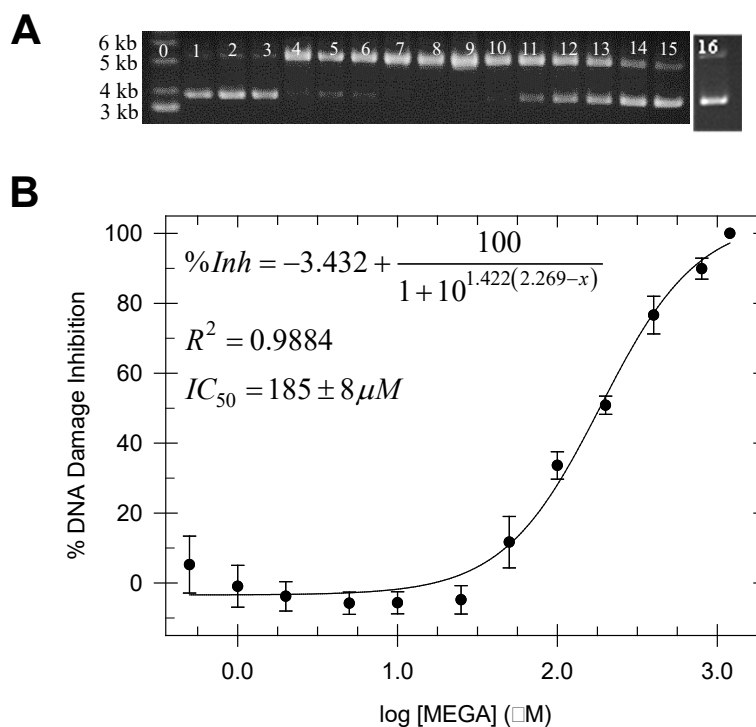

**Figure S4.** (A) Gel electrophoresis image of DNA treated with  $^{\text{NP}}\text{CuO}$  (500  $\mu\text{M}$ ) and  $\text{H}_2\text{O}_2$  (50  $\mu\text{M}$ ) and MEGA (0.5 – 1200  $\mu\text{M}$ ) at pH 7 (MOPS buffer) for 150 min. Lane 0: 1 kb molecular weight ladder; lane 1: plasmid (p); lane 2: p +  $\text{H}_2\text{O}_2$  (50  $\mu\text{M}$ ); lane 3: p + MEGA (800  $\mu\text{M}$ ); lane 4: p +  $^{\text{NP}}\text{CuO}$  (500  $\mu\text{M}$ ) +  $\text{H}_2\text{O}_2$  (50  $\mu\text{M}$ ); lanes 5 -16: p +  $^{\text{NP}}\text{CuO}$  (500  $\mu\text{M}$ ) + increasing concentrations of MEGA (0.5, 1, 2, 5, 10, 25, 50, 100, 200, 400, 800, and 1200  $\mu\text{M}$ , respectively) and  $\text{H}_2\text{O}_2$  (50  $\mu\text{M}$ ). (B) Percentage of DNA damage inhibition with respect to MEGA concentration in the presence of  $^{\text{NP}}\text{CuO}$  and  $\text{H}_2\text{O}_2$ .

**Table S5.** DNA damage inhibition by epigallocatechin gallate (EGCG; 0.5 – 800  $\mu\text{M}$ ) with  $^{\text{NP}}\text{CuO}$  (500  $\mu\text{M}$ ) and  $\text{H}_2\text{O}_2$  (50  $\mu\text{M}$ ) at pH 7 for 150 min.

| Gel lane | Contents                                                                                       | [EGCG] ( $\mu\text{M}$ ) | % Supercoiled DNA |            | % Nicked DNA |            | <i>p</i> Value |
|----------|------------------------------------------------------------------------------------------------|--------------------------|-------------------|------------|--------------|------------|----------------|
| 1        | plasmid (p)                                                                                    | 0                        | 98.6              | $\pm$ 1.3  | 1.4          | $\pm$ 1.3  | -              |
| 2        | p + $\text{H}_2\text{O}_2$ (50 $\mu\text{M}$ )                                                 | 0                        | 98.6              | $\pm$ 0.6  | 1.4          | $\pm$ 0.6  | -              |
| 3        | p + EGCG (800 $\mu\text{M}$ )                                                                  | 800                      | 98.1              | $\pm$ 1.9  | 1.9          | $\pm$ 1.9  | -              |
| 4        | p + $^{\text{NP}}\text{CuO}$ (500 $\mu\text{M}$ ) + $\text{H}_2\text{O}_2$ (50 $\mu\text{M}$ ) | 0                        | 5.3               | $\pm$ 7.0  | 94.7         | $\pm$ 7.0  | -              |
| 5        | p + $^{\text{NP}}\text{CuO}$ + $\text{H}_2\text{O}_2$ + EGCG                                   | 0.5                      | 3.4               | $\pm$ 4.6  | 96.6         | $\pm$ 4.6  | 0.5486         |
| 6        | p + $^{\text{NP}}\text{CuO}$ + $\text{H}_2\text{O}_2$ + EGCG                                   | 1                        | 0.7               | $\pm$ 0.8  | 99.3         | $\pm$ 0.8  | 0.0099         |
| 7        | p + $^{\text{NP}}\text{CuO}$ + $\text{H}_2\text{O}_2$ + EGCG                                   | 2                        | 0.0               | $\pm$ 0.0  | 100.0        | $\pm$ 0.0  | 0.32           |
| 8        | p + $^{\text{NP}}\text{CuO}$ + $\text{H}_2\text{O}_2$ + EGCG                                   | 5                        | 5.3               | $\pm$ 5.4  | 94.7         | $\pm$ 5.4  | >0.9999        |
| 9        | p + $^{\text{NP}}\text{CuO}$ + $\text{H}_2\text{O}_2$ + EGCG                                   | 10                       | 18.5              | $\pm$ 20.0 | 81.5         | $\pm$ 20.0 | 0.3714         |
| 10       | p + $^{\text{NP}}\text{CuO}$ + $\text{H}_2\text{O}_2$ + EGCG                                   | 25                       | 33.0              | $\pm$ 24.3 | 67.0         | $\pm$ 24.3 | 0.187          |
| 11       | p + $^{\text{NP}}\text{CuO}$ + $\text{H}_2\text{O}_2$ + EGCG                                   | 50                       | 34.9              | $\pm$ 22.6 | 65.1         | $\pm$ 22.6 | 0.1514         |
| 12       | p + $^{\text{NP}}\text{CuO}$ + $\text{H}_2\text{O}_2$ + EGCG                                   | 100                      | 35.1              | $\pm$ 20.1 | 64.9         | $\pm$ 20.1 | 0.1241         |
| 13       | p + $^{\text{NP}}\text{CuO}$ + $\text{H}_2\text{O}_2$ + EGCG                                   | 200                      | 35.7              | $\pm$ 18.9 | 64.3         | $\pm$ 18.9 | 0.1083         |
| 14       | p + $^{\text{NP}}\text{CuO}$ + $\text{H}_2\text{O}_2$ + EGCG                                   | 400                      | 35.1              | $\pm$ 15.7 | 64.9         | $\pm$ 15.7 | 0.0814         |
| 15       | p + $^{\text{NP}}\text{CuO}$ + $\text{H}_2\text{O}_2$ + EGCG                                   | 800                      | 45.6              | $\pm$ 17.8 | 54.4         | $\pm$ 17.8 | 0.0593         |

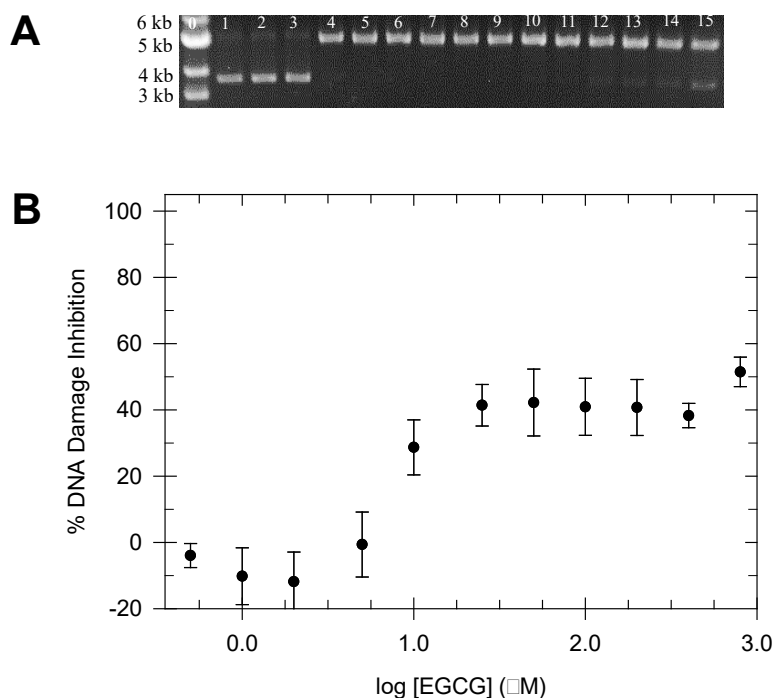

**Figure S5.** (A) Gel electrophoresis image of DNA treated with  $^{\text{NP}}\text{CuO}$  (500  $\mu\text{M}$ ),  $\text{H}_2\text{O}_2$  (50  $\mu\text{M}$ ), and EGCG (0.5 – 800  $\mu\text{M}$ ) at pH 7 (MOPS buffer) for 150 min. Lane 0: 1 kb molecular weight ladder; lane 1: plasmid (p); lane 2: p +  $\text{H}_2\text{O}_2$  (50  $\mu\text{M}$ ); lane 3: p + EGCG (800  $\mu\text{M}$ ); lane 4: p +  $^{\text{NP}}\text{CuO}$  (500  $\mu\text{M}$ ) +  $\text{H}_2\text{O}_2$  (50  $\mu\text{M}$ ); lanes 5-15: p +  $^{\text{NP}}\text{CuO}$  (500  $\mu\text{M}$ ) + increasing concentrations of EGCG (0.5, 1, 2, 5, 10, 25, 50, 100, 200, 400, and 800  $\mu\text{M}$ , respectively) and  $\text{H}_2\text{O}_2$  (50  $\mu\text{M}$ ). (B) Percentage of DNA damage inhibition with respect to EGCG concentration in the presence of  $^{\text{NP}}\text{CuO}$  and  $\text{H}_2\text{O}_2$ .

**Table S6.** DNA damage inhibition by protocatechuic acid (PCA; 0.5 – 800  $\mu\text{M}$ ) with  $^{\text{NP}}\text{CuO}$  (500  $\mu\text{M}$ ) and  $\text{H}_2\text{O}_2$  (50  $\mu\text{M}$ ) at pH 7 for 150 min.

| Gel lane | Contents                                                                                       | [PCA] ( $\mu\text{M}$ ) | % Supercoiled DNA | % Nicked DNA    | <i>p</i> Value |
|----------|------------------------------------------------------------------------------------------------|-------------------------|-------------------|-----------------|----------------|
| 1        | plasmid (p)                                                                                    | 0                       | 96.6 $\pm$ 2.3    | 3.4 $\pm$ 2.3   | -              |
| 2        | p + $\text{H}_2\text{O}_2$ (50 $\mu\text{M}$ )                                                 | 0                       | 98.2 $\pm$ 2.0    | 1.8 $\pm$ 2.0   | -              |
| 3        | p + PCA (800 $\mu\text{M}$ )                                                                   | 800                     | 89.3 $\pm$ 6.8    | 10.7 $\pm$ 6.8  | -              |
| 4        | p + $^{\text{NP}}\text{CuO}$ (500 $\mu\text{M}$ ) + $\text{H}_2\text{O}_2$ (50 $\mu\text{M}$ ) | 0                       | 23.8 $\pm$ 28.1   | 76.2 $\pm$ 28.1 | -              |
| 5        | p + $^{\text{NP}}\text{CuO}$ + $\text{H}_2\text{O}_2$ + PCA                                    | 0.5                     | 17.5 $\pm$ 21.0   | 82.5 $\pm$ 21.0 | 0.6551         |
| 6        | p + $^{\text{NP}}\text{CuO}$ + $\text{H}_2\text{O}_2$ + PCA                                    | 1                       | 10.4 $\pm$ 12.3   | 89.6 $\pm$ 12.3 | 0.1998         |
| 7        | p + $^{\text{NP}}\text{CuO}$ + $\text{H}_2\text{O}_2$ + PCA                                    | 2                       | 7.9 $\pm$ 9.6     | 92.1 $\pm$ 9.6  | 0.1031         |
| 8        | p + $^{\text{NP}}\text{CuO}$ + $\text{H}_2\text{O}_2$ + PCA                                    | 5                       | 5.1 $\pm$ 8.7     | 94.9 $\pm$ 8.7  | 0.0652         |
| 9        | p + $^{\text{NP}}\text{CuO}$ + $\text{H}_2\text{O}_2$ + PCA                                    | 10                      | 10.9 $\pm$ 12.4   | 89.1 $\pm$ 12.4 | 0.2134         |
| 10       | p + $^{\text{NP}}\text{CuO}$ + $\text{H}_2\text{O}_2$ + PCA                                    | 25                      | 11.6 $\pm$ 14.7   | 88.4 $\pm$ 14.7 | 0.2871         |
| 11       | p + $^{\text{NP}}\text{CuO}$ + $\text{H}_2\text{O}_2$ + PCA                                    | 50                      | 11.7 $\pm$ 13.6   | 88.3 $\pm$ 13.6 | 0.2632         |
| 12       | p + $^{\text{NP}}\text{CuO}$ + $\text{H}_2\text{O}_2$ + PCA                                    | 100                     | 16.2 $\pm$ 18.9   | 83.8 $\pm$ 18.9 | 0.5582         |
| 13       | p + $^{\text{NP}}\text{CuO}$ + $\text{H}_2\text{O}_2$ + PCA                                    | 200                     | 15.7 $\pm$ 16.8   | 84.3 $\pm$ 16.8 | 0.4915         |
| 14       | p + $^{\text{NP}}\text{CuO}$ + $\text{H}_2\text{O}_2$ + PCA                                    | 400                     | 25.1 $\pm$ 19.8   | 74.9 $\pm$ 19.8 | 0.9198         |
| 15       | p + $^{\text{NP}}\text{CuO}$ + $\text{H}_2\text{O}_2$ + PCA                                    | 800                     | 35.3 $\pm$ 12.8   | 64.7 $\pm$ 12.8 | 0.26           |

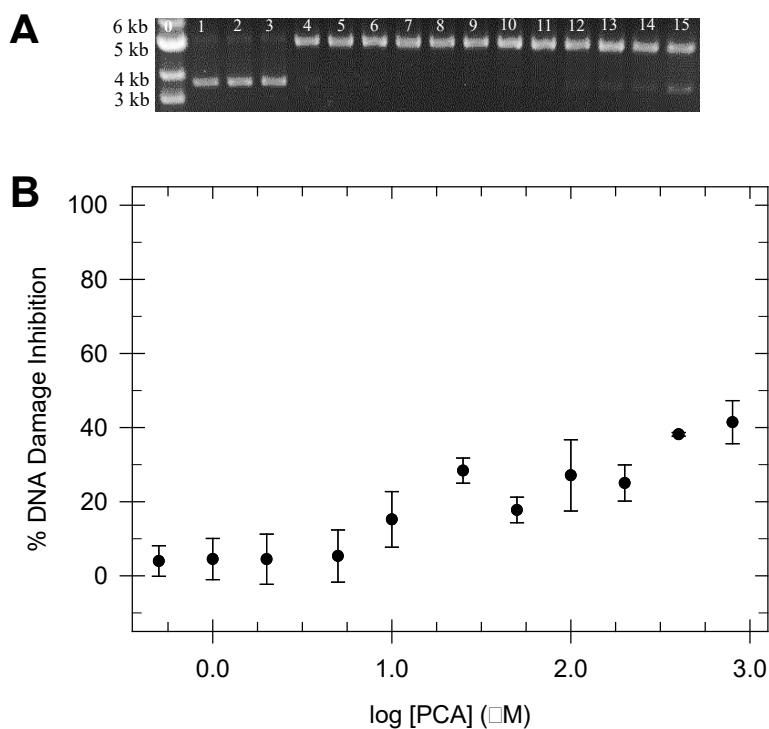

**Figure S6.** (A) Gel electrophoresis image of DNA treated with  $^{\text{NP}}\text{CuO}$  (500  $\mu\text{M}$ ),  $\text{H}_2\text{O}_2$  (50  $\mu\text{M}$ ), and PCA (0.5 – 800  $\mu\text{M}$ ) at pH 7 (MOPS buffer) for 150 min. Lane 0: 1 kb molecular weight ladder; lane 1: plasmid (p); lane 2: p +  $\text{H}_2\text{O}_2$  (50  $\mu\text{M}$ ); lane 3: p + PCA (800  $\mu\text{M}$ ); lane 4: p +  $^{\text{NP}}\text{CuO}$  (500  $\mu\text{M}$ ) +  $\text{H}_2\text{O}_2$  (50  $\mu\text{M}$ ); lanes 5-15: p +  $^{\text{NP}}\text{CuO}$  (500  $\mu\text{M}$ ) + increasing concentrations of PCA (0.5, 1, 2, 5, 10, 25, 50, 100, 200, 400, and 800  $\mu\text{M}$ , respectively) and  $\text{H}_2\text{O}_2$  (50  $\mu\text{M}$ ). (B) Percentage of DNA damage inhibition with respect to PCA concentration in the presence of  $^{\text{NP}}\text{CuO}$  and  $\text{H}_2\text{O}_2$ .

**Table S7.** DNA damage inhibition by vanillic acid (VA; 0.5 – 800  $\mu\text{M}$ ) with  $^{\text{NP}}\text{CuO}$  (500  $\mu\text{M}$ ) and  $\text{H}_2\text{O}_2$  (50  $\mu\text{M}$ ) at pH 7 for 150 min.

| Gel lane | Contents                                                                                       | [VA] ( $\mu\text{M}$ ) | % Supercoiled DNA | % Nicked DNA    | <i>p</i> Value |
|----------|------------------------------------------------------------------------------------------------|------------------------|-------------------|-----------------|----------------|
| 1        | plasmid (p)                                                                                    | 0                      | 93.7 $\pm$ 3.5    | 6.3 $\pm$ 3.5   | -              |
| 2        | p + $\text{H}_2\text{O}_2$ (50 $\mu\text{M}$ )                                                 | 0                      | 93.2 $\pm$ 6.6    | 6.8 $\pm$ 6.6   | -              |
| 3        | p + VA (800 $\mu\text{M}$ )                                                                    | 800                    | 92.7 $\pm$ 7.4    | 7.3 $\pm$ 7.4   | -              |
| 4        | p + $^{\text{NP}}\text{CuO}$ (500 $\mu\text{M}$ ) + $\text{H}_2\text{O}_2$ (50 $\mu\text{M}$ ) | 0                      | 2.4 $\pm$ 4.0     | 97.6 $\pm$ 4.0  | -              |
| 5        | p + $^{\text{NP}}\text{CuO}$ + $\text{H}_2\text{O}_2$ + VA                                     | 0.5                    | 0.0 $\pm$ 0.0     | 100.0 $\pm$ 0.0 | 0.0002         |
| 6        | p + $^{\text{NP}}\text{CuO}$ + $\text{H}_2\text{O}_2$ + VA                                     | 1                      | 0.2 $\pm$ 0.2     | 99.8 $\pm$ 0.2  | 0.0027         |
| 7        | p + $^{\text{NP}}\text{CuO}$ + $\text{H}_2\text{O}_2$ + VA                                     | 2                      | 0.0 $\pm$ 0.0     | 100.0 $\pm$ 0.0 | 0.0002         |
| 8        | p + $^{\text{NP}}\text{CuO}$ + $\text{H}_2\text{O}_2$ + VA                                     | 5                      | 0.2 $\pm$ 0.3     | 99.8 $\pm$ 0.3  | 0.0061         |
| 9        | p + $^{\text{NP}}\text{CuO}$ + $\text{H}_2\text{O}_2$ + VA                                     | 10                     | 3.1 $\pm$ 5.3     | 96.9 $\pm$ 5.3  | 0.8403         |
| 10       | p + $^{\text{NP}}\text{CuO}$ + $\text{H}_2\text{O}_2$ + VA                                     | 25                     | 1.2 $\pm$ 2.1     | 98.8 $\pm$ 2.1  | 0.4266         |
| 11       | p + $^{\text{NP}}\text{CuO}$ + $\text{H}_2\text{O}_2$ + VA                                     | 50                     | 0.1 $\pm$ 0.1     | 99.9 $\pm$ 0.1  | 0.0006         |
| 12       | p + $^{\text{NP}}\text{CuO}$ + $\text{H}_2\text{O}_2$ + VA                                     | 100                    | 0.1 $\pm$ 0.1     | 99.9 $\pm$ 0.1  | 0.0006         |
| 13       | p + $^{\text{NP}}\text{CuO}$ + $\text{H}_2\text{O}_2$ + VA                                     | 200                    | 0.0 $\pm$ 0.0     | 100.0 $\pm$ 0.0 | 0.0002         |
| 14       | p + $^{\text{NP}}\text{CuO}$ + $\text{H}_2\text{O}_2$ + VA                                     | 400                    | 0.1 $\pm$ 0.1     | 99.9 $\pm$ 0.1  | 0.0006         |
| 15       | p + $^{\text{NP}}\text{CuO}$ + $\text{H}_2\text{O}_2$ + VA                                     | 800                    | 0.1 $\pm$ 0.1     | 99.9 $\pm$ 0.1  | 0.0006         |

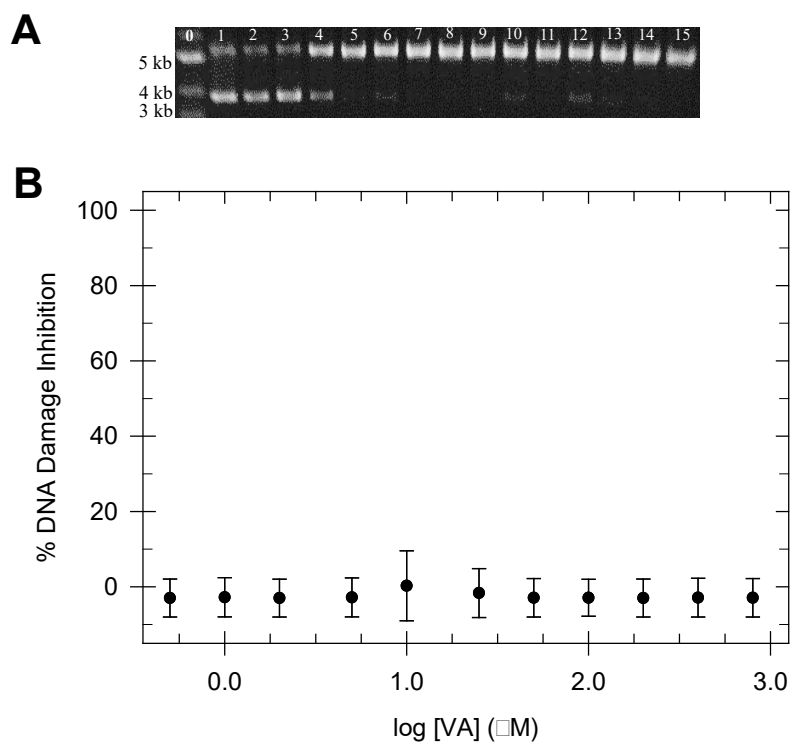

**Figure S7.** (A) Gel electrophoresis image of DNA treated with  $^{\text{NP}}\text{CuO}$  (500  $\mu\text{M}$ ),  $\text{H}_2\text{O}_2$  (50  $\mu\text{M}$ ), and VA (0.5 – 800  $\mu\text{M}$ ) at pH 7 (MOPS buffer) for 150 min. Lane 0: 1 kb molecular weight ladder; lane 1: plasmid (p); lane 2: p +  $\text{H}_2\text{O}_2$  (50  $\mu\text{M}$ ); lane 3: p + VA (800  $\mu\text{M}$ ); lane 4: p +  $^{\text{NP}}\text{CuO}$  (500  $\mu\text{M}$ ) +  $\text{H}_2\text{O}_2$  (50  $\mu\text{M}$ ); lanes 5-15: p +  $^{\text{NP}}\text{CuO}$  (500  $\mu\text{M}$ ) + increasing concentrations of VA (0.5, 1, 2, 5, 10, 25, 50, 100, 200, 400, and 800  $\mu\text{M}$ , respectively) and  $\text{H}_2\text{O}_2$  (50  $\mu\text{M}$ ). (B) Percentage of DNA damage inhibition with respect to VA concentration in the presence of  $^{\text{NP}}\text{CuO}$  and  $\text{H}_2\text{O}_2$ .



**Table S8.** DNA damage inhibition by epicatechin (EC; 0.5 – 800  $\mu\text{M}$ ) with  $^{\text{NP}}\text{CuO}$  (500  $\mu\text{M}$ ) and  $\text{H}_2\text{O}_2$  (50  $\mu\text{M}$ ) at pH 7 for 150 min.

| Gel lane | Contents                                                                                       | [EC] ( $\mu\text{M}$ ) | % Supercoiled DNA | % Nicked DNA    | <i>p</i> Value |
|----------|------------------------------------------------------------------------------------------------|------------------------|-------------------|-----------------|----------------|
| 1        | plasmid (p)                                                                                    | 0                      | 97.8 $\pm$ 0.5    | 2.2 $\pm$ 0.5   | -              |
| 2        | p + $\text{H}_2\text{O}_2$ (50 $\mu\text{M}$ )                                                 | 0                      | 94.0 $\pm$ 3.9    | 6.0 $\pm$ 3.9   | -              |
| 3        | p + EC (800 $\mu\text{M}$ )                                                                    | 800                    | 95.4 $\pm$ 4.4    | 4.6 $\pm$ 4.4   | -              |
| 4        | p + $^{\text{NP}}\text{CuO}$ (500 $\mu\text{M}$ ) + $\text{H}_2\text{O}_2$ (50 $\mu\text{M}$ ) | 0                      | 2.4 $\pm$ 2.7     | 97.6 $\pm$ 2.7  | -              |
| 5        | p + $^{\text{NP}}\text{CuO}$ + $\text{H}_2\text{O}_2$ + EC                                     | 0.5                    | 5.2 $\pm$ 8.4     | 94.8 $\pm$ 8.4  | 0.622          |
| 6        | p + $^{\text{NP}}\text{CuO}$ + $\text{H}_2\text{O}_2$ + EC                                     | 1                      | 0.2 $\pm$ 0.3     | 99.8 $\pm$ 0.3  | 0.0061         |
| 7        | p + $^{\text{NP}}\text{CuO}$ + $\text{H}_2\text{O}_2$ + EC                                     | 2                      | 1.0 $\pm$ 1.3     | 99.0 $\pm$ 1.3  | 0.2031         |
| 8        | p + $^{\text{NP}}\text{CuO}$ + $\text{H}_2\text{O}_2$ + EC                                     | 5                      | 0.4 $\pm$ 0.4     | 99.6 $\pm$ 0.4  | 0.0131         |
| 9        | p + $^{\text{NP}}\text{CuO}$ + $\text{H}_2\text{O}_2$ + EC                                     | 10                     | 1.1 $\pm$ 1.4     | 98.9 $\pm$ 1.4  | 0.249          |
| 10       | p + $^{\text{NP}}\text{CuO}$ + $\text{H}_2\text{O}_2$ + EC                                     | 25                     | 1.7 $\pm$ 1.5     | 98.3 $\pm$ 1.5  | 0.5038         |
| 11       | p + $^{\text{NP}}\text{CuO}$ + $\text{H}_2\text{O}_2$ + EC                                     | 50                     | 0.0 $\pm$ 0.0     | 100.0 $\pm$ 0.0 | >0.9999        |
| 12       | p + $^{\text{NP}}\text{CuO}$ + $\text{H}_2\text{O}_2$ + EC                                     | 100                    | 0.0 $\pm$ 0.0     | 100.0 $\pm$ 0.0 | >0.9999        |
| 13       | p + $^{\text{NP}}\text{CuO}$ + $\text{H}_2\text{O}_2$ + EC                                     | 200                    | 0.0 $\pm$ 0.0     | 100.0 $\pm$ 0.0 | >0.9999        |
| 14       | p + $^{\text{NP}}\text{CuO}$ + $\text{H}_2\text{O}_2$ + EC                                     | 400                    | 0.0 $\pm$ 0.0     | 100.0 $\pm$ 0.0 | >0.9999        |
| 15       | p + $^{\text{NP}}\text{CuO}$ + $\text{H}_2\text{O}_2$ + EC                                     | 800                    | 0.0 $\pm$ 0.0     | 100.0 $\pm$ 0.0 | >0.9999        |

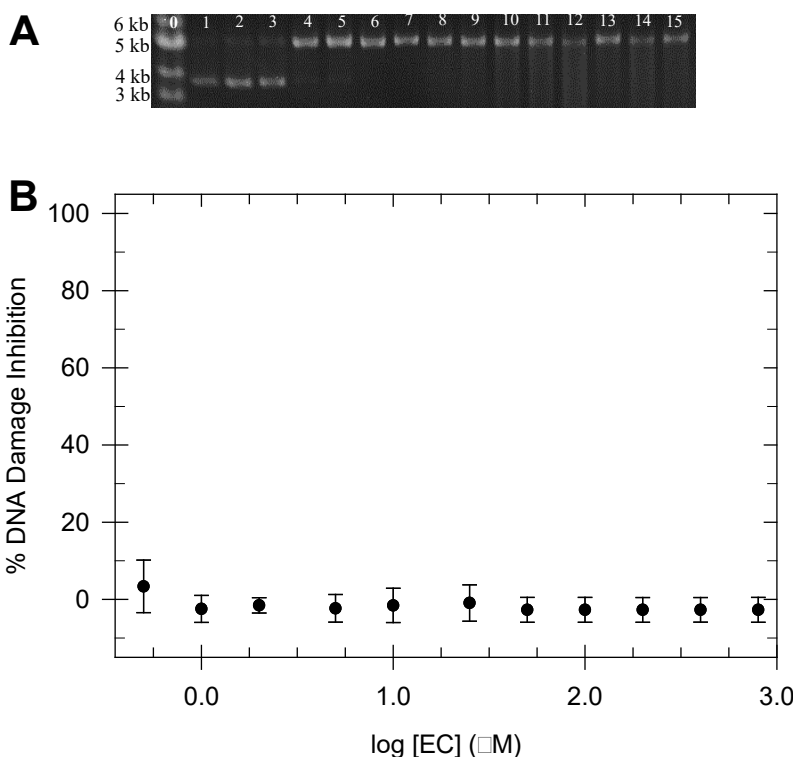

**Figure S8.** (A) Gel electrophoresis image of DNA treated with  $^{\text{NP}}\text{CuO}$  (500  $\mu\text{M}$ ),  $\text{H}_2\text{O}_2$  (50  $\mu\text{M}$ ), and EC (0.5 – 800  $\mu\text{M}$ ) at pH 7 (MOPS buffer) for 150 min. Lane 0: 1 kb molecular weight ladder; lane 1: plasmid (p); lane 2: p +  $\text{H}_2\text{O}_2$  (50  $\mu\text{M}$ ); lane 3: p + EC (800  $\mu\text{M}$ ); lane 4: p +  $^{\text{NP}}\text{CuO}$  (500  $\mu\text{M}$ ) +  $\text{H}_2\text{O}_2$  (50  $\mu\text{M}$ ); lanes 5-15: p +  $^{\text{NP}}\text{CuO}$  (500  $\mu\text{M}$ ) + increasing concentrations of EC (0.5, 1, 2, 5, 10, 25, 50, 100, 200, 400, and 800  $\mu\text{M}$ , respectively) and  $\text{H}_2\text{O}_2$  (50  $\mu\text{M}$ ). (B) Percentage of DNA damage inhibition with respect to EC concentration in the presence of  $^{\text{NP}}\text{CuO}$  and  $\text{H}_2\text{O}_2$ .

**Table S9.** DNA damage inhibition by gallic acid (GA; 0.5 – 800  $\mu\text{M}$ ) with  $^{\text{NP}}\text{CuO}$  (500  $\mu\text{M}$ ) and  $\text{H}_2\text{O}_2$  (50  $\mu\text{M}$ ) at pH 7 for 150 min.

| Gel lane | Contents                                                                                       | [GA] ( $\mu\text{M}$ ) | % Supercoiled DNA | % Nicked DNA    | <i>p</i> Value |
|----------|------------------------------------------------------------------------------------------------|------------------------|-------------------|-----------------|----------------|
| 1        | plasmid (p)                                                                                    | 0                      | 93.1 $\pm$ 1.1    | 6.9 $\pm$ 1.1   | -              |
| 2        | p + $\text{H}_2\text{O}_2$ (50 $\mu\text{M}$ )                                                 | 0                      | 97.6 $\pm$ 0.5    | 2.4 $\pm$ 0.5   | -              |
| 3        | p + GA (800 $\mu\text{M}$ )                                                                    | 800                    | 94.8 $\pm$ 3.6    | 5.2 $\pm$ 3.6   | -              |
| 4        | p + $^{\text{NP}}\text{CuO}$ (500 $\mu\text{M}$ ) + $\text{H}_2\text{O}_2$ (50 $\mu\text{M}$ ) | 0                      | 8.7 $\pm$ 2.0     | 91.3 $\pm$ 2.0  | -              |
| 5        | p + $^{\text{NP}}\text{CuO}$ + $\text{H}_2\text{O}_2$ + GA                                     | 0.5                    | 6.5 $\pm$ 5.9     | 93.5 $\pm$ 5.9  | 0.5846         |
| 6        | p + $^{\text{NP}}\text{CuO}$ + $\text{H}_2\text{O}_2$ + GA                                     | 1                      | 5.3 $\pm$ 8.7     | 94.7 $\pm$ 8.7  | 0.5683         |
| 7        | p + $^{\text{NP}}\text{CuO}$ + $\text{H}_2\text{O}_2$ + GA                                     | 2                      | 0.0 $\pm$ 0.0     | 100.0 $\pm$ 0.0 | >0.9999        |
| 8        | p + $^{\text{NP}}\text{CuO}$ + $\text{H}_2\text{O}_2$ + GA                                     | 5                      | 0.0 $\pm$ 0.0     | 100.0 $\pm$ 0.0 | >0.9999        |
| 9        | p + $^{\text{NP}}\text{CuO}$ + $\text{H}_2\text{O}_2$ + GA                                     | 10                     | 0.0 $\pm$ 0.0     | 100.0 $\pm$ 0.0 | >0.9999        |
| 10       | p + $^{\text{NP}}\text{CuO}$ + $\text{H}_2\text{O}_2$ + GA                                     | 25                     | 0.0 $\pm$ 0.0     | 100.0 $\pm$ 0.0 | >0.9999        |
| 11       | p + $^{\text{NP}}\text{CuO}$ + $\text{H}_2\text{O}_2$ + GA                                     | 50                     | 0.3 $\pm$ 0.5     | 99.7 $\pm$ 0.5  | 0.0012         |
| 12       | p + $^{\text{NP}}\text{CuO}$ + $\text{H}_2\text{O}_2$ + GA                                     | 100                    | 0.0 $\pm$ 0.0     | 100.0 $\pm$ 0.0 | >0.9999        |
| 13       | p + $^{\text{NP}}\text{CuO}$ + $\text{H}_2\text{O}_2$ + GA                                     | 200                    | 0.0 $\pm$ 0.0     | 100.0 $\pm$ 0.0 | >0.9999        |
| 14       | p + $^{\text{NP}}\text{CuO}$ + $\text{H}_2\text{O}_2$ + GA                                     | 400                    | 0.0 $\pm$ 0.0     | 100.0 $\pm$ 0.0 | >0.9999        |
| 15       | p + $^{\text{NP}}\text{CuO}$ + $\text{H}_2\text{O}_2$ + GA                                     | 800                    | 0.0 $\pm$ 0.0     | 100.0 $\pm$ 0.0 | >0.9999        |

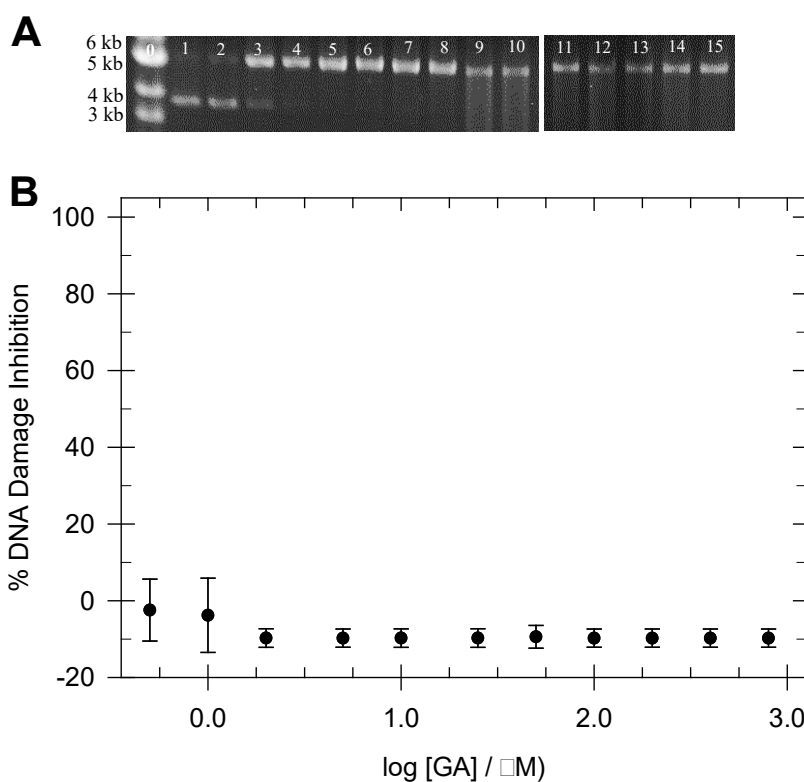

**Figure S9.** (A) Gel electrophoresis image of DNA treated with  $^{\text{NP}}\text{CuO}$  (500  $\mu\text{M}$ ),  $\text{H}_2\text{O}_2$  (50  $\mu\text{M}$ ), and GA (0.5 – 800  $\mu\text{M}$ ) at pH 7 (MOPS buffer) for 150 min. Lane 0: 1 kb molecular weight ladder; lane 1: plasmid (p); lane 2: p +  $\text{H}_2\text{O}_2$  (50  $\mu\text{M}$ ); lane 3: p + GA (800  $\mu\text{M}$ ); lane 4: p +  $^{\text{NP}}\text{CuO}$  (500  $\mu\text{M}$ ) +  $\text{H}_2\text{O}_2$  (50  $\mu\text{M}$ ); lanes 5-15: p +  $^{\text{NP}}\text{CuO}$  (500  $\mu\text{M}$ ) + increasing concentrations of GA (0.5, 1, 2, 5, 10, 25, 50, 100, 200, 400, and 800  $\mu\text{M}$ , respectively) and  $\text{H}_2\text{O}_2$  (50  $\mu\text{M}$ ). (B) Percentage of DNA damage inhibition with respect to GA concentration in the presence of  $^{\text{NP}}\text{CuO}$  and  $\text{H}_2\text{O}_2$ .

**Table S10.** DNA damage inhibition by epigallocatechin (EGC; 0.5 – 800  $\mu\text{M}$ ) with  $^{NP}\text{CuO}$  (500  $\mu\text{M}$ ) and  $\text{H}_2\text{O}_2$  (50  $\mu\text{M}$ ) at pH 7 for 150 min.

| Gel lane | Contents                                                                                       | [EGC] ( $\mu\text{M}$ ) | % Supercoiled DNA | % Nicked DNA    | <i>p</i> Value |
|----------|------------------------------------------------------------------------------------------------|-------------------------|-------------------|-----------------|----------------|
| 1        | plasmid + diH <sub>2</sub> O                                                                   | 0                       | 98.3 $\pm$ 1.6    | 1.7 $\pm$ 1.6   | -              |
| 2        | p + H <sub>2</sub> O <sub>2</sub> (50 $\mu\text{M}$ )                                          | 0                       | 98.5 $\pm$ 0.4    | 1.5 $\pm$ 0.4   | -              |
| 3        | p + EGC (800 $\mu\text{M}$ )                                                                   | 800                     | 31.3 $\pm$ 5.1    | 68.7 $\pm$ 5.1  | -              |
| 4        | p + $^{NP}\text{CuO}$ (500 $\mu\text{M}$ ) + H <sub>2</sub> O <sub>2</sub> (50 $\mu\text{M}$ ) | 0                       | 0.5 $\pm$ 0.7     | 99.5 $\pm$ 0.7  | -              |
| 5        | p + $^{NP}\text{CuO}$ + H <sub>2</sub> O <sub>2</sub> + EGC                                    | 0.5                     | 0.0 $\pm$ 0.0     | 100.0 $\pm$ 0.0 | >0.9999        |
| 6        | p + $^{NP}\text{CuO}$ + H <sub>2</sub> O <sub>2</sub> + EGC                                    | 1                       | 0.0 $\pm$ 0.0     | 100.0 $\pm$ 0.0 | >0.9999        |
| 7        | p + $^{NP}\text{CuO}$ + H <sub>2</sub> O <sub>2</sub> + EGC                                    | 2                       | 0.0 $\pm$ 0.0     | 100.0 $\pm$ 0.0 | >0.9999        |
| 8        | p + $^{NP}\text{CuO}$ + H <sub>2</sub> O <sub>2</sub> + EGC                                    | 5                       | 0.7 $\pm$ 0.7     | 99.3 $\pm$ 0.7  | 0.6697         |
| 9        | p + $^{NP}\text{CuO}$ + H <sub>2</sub> O <sub>2</sub> + EGC                                    | 10                      | 1.2 $\pm$ 0.8     | 98.8 $\pm$ 0.8  | 0.2689         |
| 10       | p + $^{NP}\text{CuO}$ + H <sub>2</sub> O <sub>2</sub> + EGC                                    | 25                      | 0.0 $\pm$ 0.0     | 100.0 $\pm$ 0.0 | >0.9999        |
| 11       | p + $^{NP}\text{CuO}$ + H <sub>2</sub> O <sub>2</sub> + EGC                                    | 50                      | 0.0 $\pm$ 0.0     | 100.0 $\pm$ 0.0 | >0.9999        |
| 12       | p + $^{NP}\text{CuO}$ + H <sub>2</sub> O <sub>2</sub> + EGC                                    | 100                     | 0.0 $\pm$ 0.0     | 100.0 $\pm$ 0.0 | >0.9999        |
| 13       | p + $^{NP}\text{CuO}$ + H <sub>2</sub> O <sub>2</sub> + EGC                                    | 200                     | 0.0 $\pm$ 0.0     | 100.0 $\pm$ 0.0 | >0.9999        |
| 14       | p + $^{NP}\text{CuO}$ + H <sub>2</sub> O <sub>2</sub> + EGC                                    | 400                     | 0.0 $\pm$ 0.0     | 100.0 $\pm$ 0.0 | >0.9999        |
| 15       | p + $^{NP}\text{CuO}$ + H <sub>2</sub> O <sub>2</sub> + EGC                                    | 800                     | 0.0 $\pm$ 0.0     | 100.0 $\pm$ 0.0 | >0.9999        |

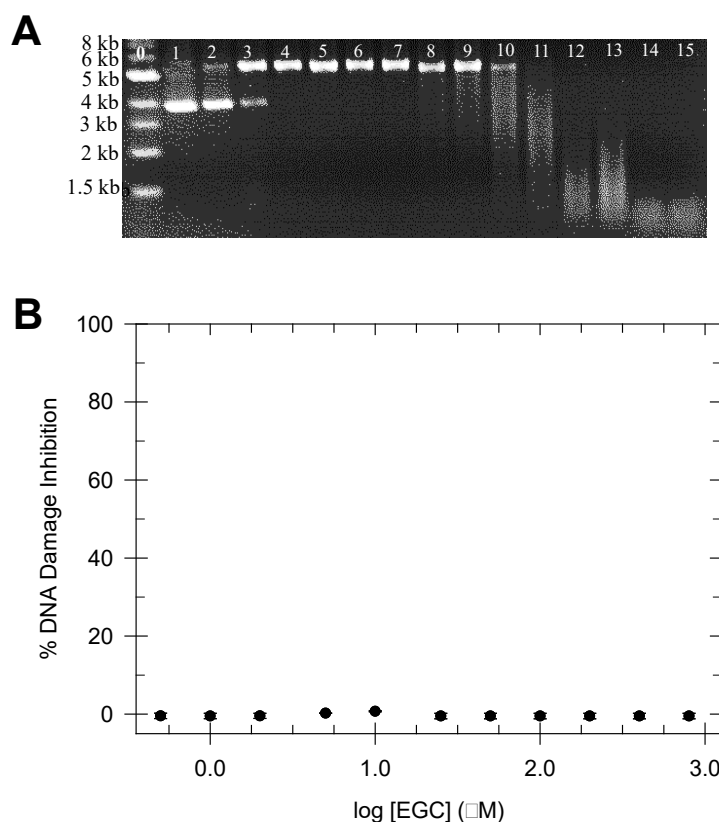

**Figure S10.** (A) Gel electrophoresis image of DNA treated with  $^{NP}\text{CuO}$  (500  $\mu\text{M}$ ),  $\text{H}_2\text{O}_2$  (50  $\mu\text{M}$ ), and EGC (0.5 – 800  $\mu\text{M}$ ) at pH 7 (MOPS buffer) for 150 min. Lane 0: 1 kb molecular weight ladder; lane 1: plasmid (p); lane 2: p +  $\text{H}_2\text{O}_2$  (50  $\mu\text{M}$ ); lane 3: p + EGC (800  $\mu\text{M}$ ); lane 4: p +  $^{NP}\text{CuO}$  (500  $\mu\text{M}$ ) +  $\text{H}_2\text{O}_2$  (50  $\mu\text{M}$ ); lanes 5-15: p +  $^{NP}\text{CuO}$  (500  $\mu\text{M}$ ) + increasing concentrations of EGC (0.5, 1, 2, 5, 10, 25, 50, 100, 200, 400, and 800  $\mu\text{M}$ , respectively) and  $\text{H}_2\text{O}_2$  (50  $\mu\text{M}$ ). (B) Percentage of DNA damage inhibition with respect to EGC concentration in the presence of  $^{NP}\text{CuO}$  and  $\text{H}_2\text{O}_2$ .

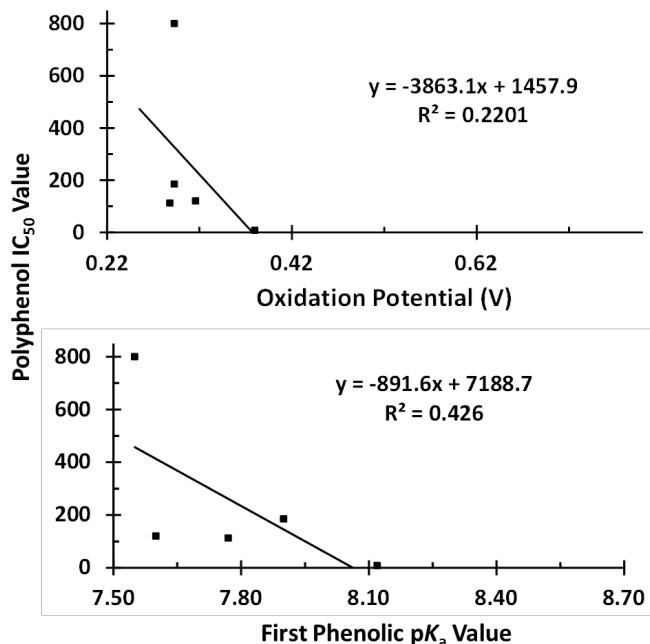

**Figure S11.** Relationship between the IC<sub>50</sub> value for polyphenol prevention of <sup>NP</sup>CuO/H<sub>2</sub>O<sub>2</sub>-mediated DNA damage and polyphenol oxidation potential (top) and pK<sub>a</sub> of the most acidic phenolic hydrogen (bottom). The equation of the best-fit lines and their correlation coefficients are indicated on each graph.

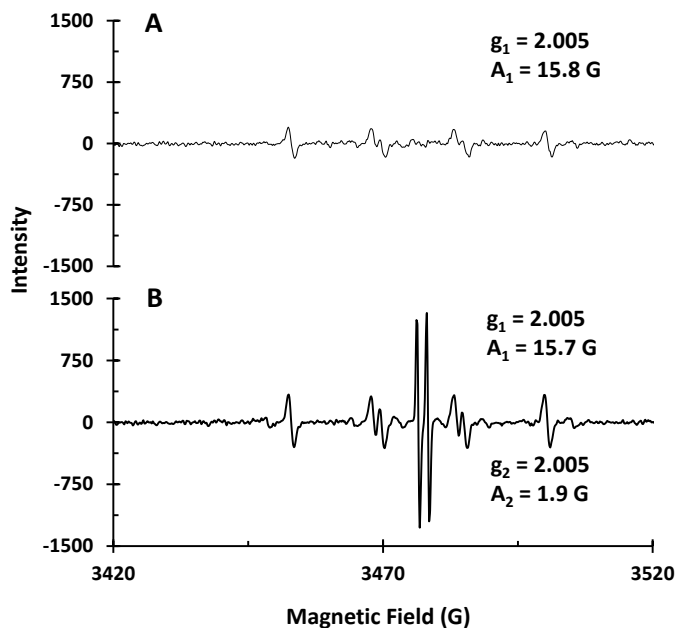

**Figure S12.** EPR spectra at room temperature of: (A) <sup>NP</sup>CuO (300 μM), H<sub>2</sub>O<sub>2</sub> (22.5 mM), and (B) <sup>NP</sup>CuO (300 μM), H<sub>2</sub>O<sub>2</sub> (22.5 mM), and ascorbic acid (375 μM). All spectra were collected at room temperature at pH 7 (MOPS 10 mM) with TEMP (30 mM) as spin trap. Parameters  $g_1$  and  $A_1$  correspond to TEMPO resonances, and parameters  $g_2$  and  $A_2$  correspond to ascorbyl radical resonances. Experimental conditions: time constant 81.92 ms, conversion time 81.92 ms, modulation amplitude 1.00 G, microwave power 20.02, and magnetic field  $3500 \pm 100$  G.

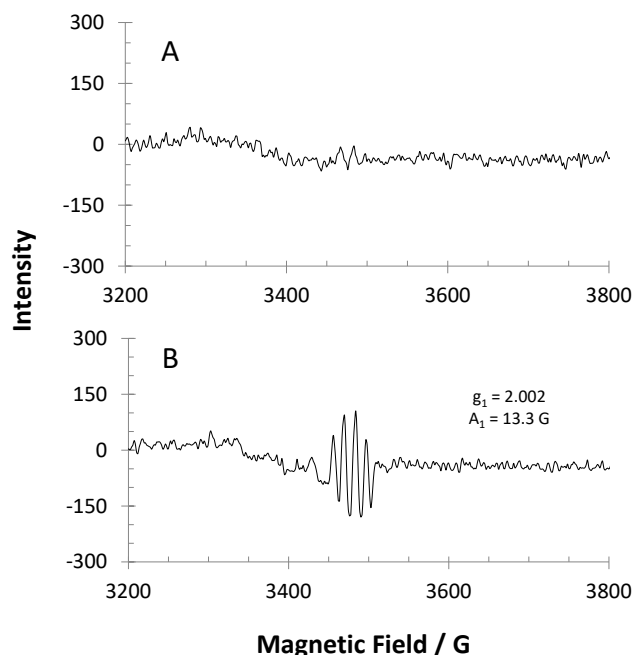

**Figure S13.** EPR spectra at room temperature of A)  $\text{H}_2\text{O}_2$  (22.5 mM) and B)  $\text{K}_2\text{O}$  (5 mM). Spectra were collected at room temperature at pH 7 (MOPS 10 mM) with DMPO (30 mM) as spin trap. Parameters  $g_1$  and  $A_1$  correspond to DMPO-OH radical resonances. Experimental conditions: time constant 81.92 ms, conversion time 81.92 ms, modulation amplitude 1.00 G, microwave power 20.02, and magnetic field  $3500 \pm 300$  G.

**Table S11.** Dynamic light scattering measurements of  $^{\text{NP}}\text{CuO}$  and  $^{\text{w}}\text{CuO}$  size, weighted by intensity.

| CuO Mean Diameter (nm)   |                      |                  |
|--------------------------|----------------------|------------------|
| Solvent                  | $\text{H}_2\text{O}$ | EMEM             |
| $^{\text{NP}}\text{CuO}$ | $175.1 \pm 13.9$     | $139.9 \pm 1.8$  |
| $^{\text{w}}\text{CuO}$  | $186.3 \pm 13.2$     | $154.4 \pm 11.1$ |

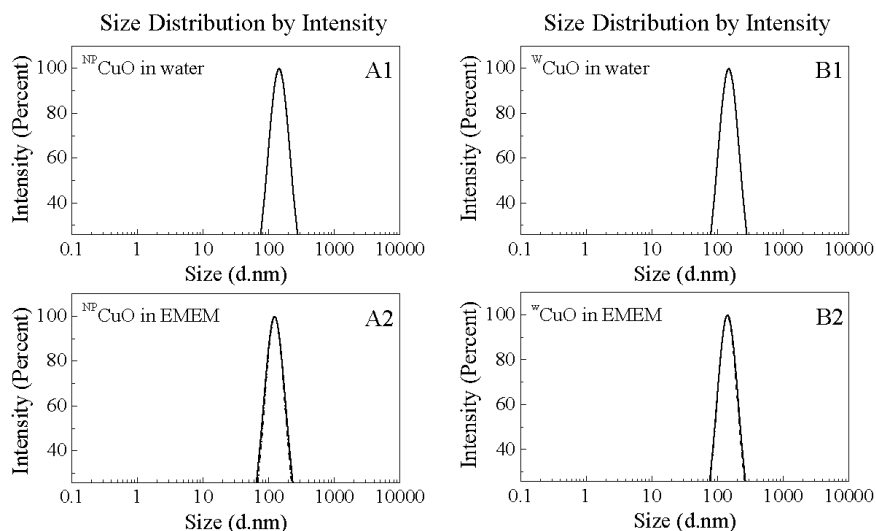

**Figure S14.** Size distribution by intensity of (A)  $^{\text{NP}}\text{CuO}$  and (B)  $^{\text{w}}\text{CuO}$  in water and EMEM, respectively.

**Table S12.** Effect of <sup>NP</sup>CuO (15.625 – 625 μM) on L929 cell viability after 24 h.

| Contents                                   | [ <sup>NP</sup> CuO] (μM) | % Viable Cells | % Non-viable Cells |
|--------------------------------------------|---------------------------|----------------|--------------------|
| L929 cells                                 | 0                         | 100.0 ± 0.0    | 0.0 ± 0.0          |
| L929 cells + <sup>NP</sup> CuO (15.625 μM) | 15.625                    | 91.8 ± 4.1     | 8.2 ± 4.1          |
| L929 cells + <sup>NP</sup> CuO             | 31.25                     | 97.7 ± 3.4     | 2.3 ± 3.4          |
| L929 cells + <sup>NP</sup> CuO             | 62.5                      | 62.0 ± 9.0     | 38.0 ± 9.0         |
| L929 cells + <sup>NP</sup> CuO             | 156.25                    | 33.7 ± 2.6     | 66.3 ± 2.6         |
| L929 cells + <sup>NP</sup> CuO             | 312.5                     | 0.2 ± 0.2      | 99.8 ± 0.2         |
| L929 cells + <sup>NP</sup> CuO             | 625                       | 1.0 ± 0.3      | 99.0 ± 0.3         |

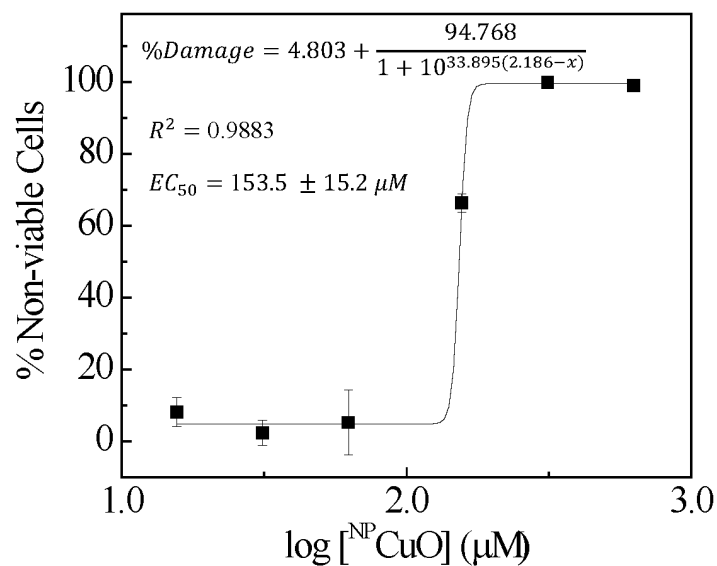

**Figure S15.** Graph of L929 cell viability with respect to <sup>NP</sup>CuO concentration showing the best-fit, sigmoidal EC<sub>50</sub> curve.

**Table S13.** Effect of washed CuO (<sup>w</sup>CuO 15.625 – 625 μM) on L929 cell viability after 24 h.

| Contents                                  | [ <sup>w</sup> CuO] (μM) | % Viable Cells | % Non-viable Cells |
|-------------------------------------------|--------------------------|----------------|--------------------|
| L929 cells                                | 0                        | 100.0 ± 0.0    | 0.0 ± 0.0          |
| L929 cells + <sup>w</sup> CuO (15.625 μM) | 15.625                   | 81.6 ± 3.2     | 18.4 ± 3.2         |
| L929 cells + <sup>w</sup> CuO             | 31.25                    | 76.0 ± 9.0     | 24.0 ± 9.0         |
| L929 cells + <sup>w</sup> CuO             | 62.5                     | 83.9 ± 7.5     | 16.1 ± 7.5         |
| L929 cells + <sup>w</sup> CuO             | 156.25                   | 58.9 ± 7.0     | 41.1 ± 7.0         |
| L929 cells + <sup>w</sup> CuO             | 312.5                    | 28.4 ± 3.7     | 71.6 ± 3.7         |
| L929 cells + <sup>w</sup> CuO             | 625                      | 25.1 ± 8.2     | 74.9 ± 8.2         |

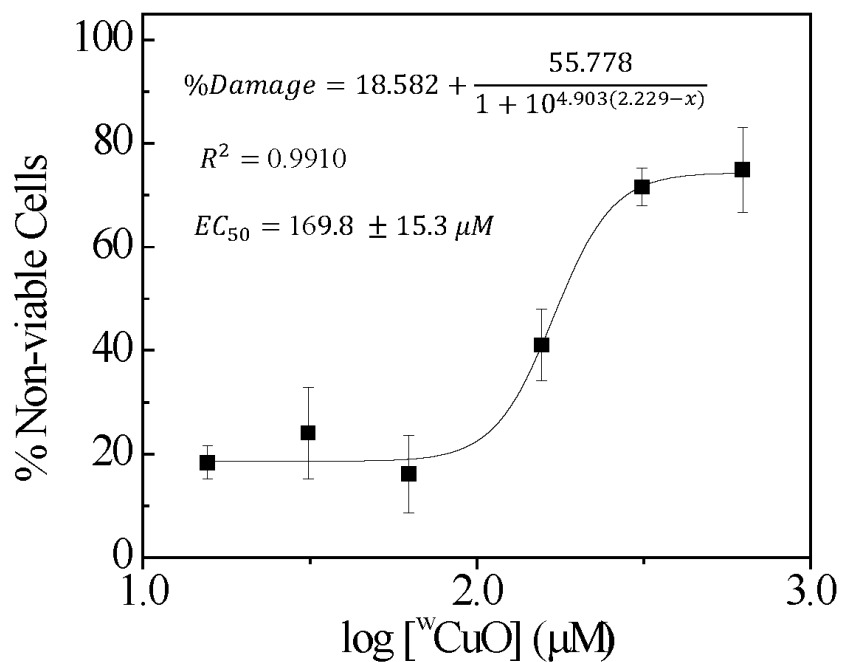

**Figure S16.** Graph of L929 cell viability with respect to <sup>w</sup>CuO concentration showing the best-fit, sigmoidal EC<sub>50</sub> curve.

**Table S14.** Effect of dissolved copper (as  $\text{CuCl}_2$ ; 0.165 – 6.6  $\mu\text{M}$ ) on L929 cell viability after 24 h.

| Contents                                             | $[\text{Cu}^{2+}]$<br>( $\mu\text{M}$ ) | % Viable Cells  | % Non-viable Cells |
|------------------------------------------------------|-----------------------------------------|-----------------|--------------------|
| L929 cells                                           | 0                                       | 100.0 $\pm$ 0.0 | 0.0 $\pm$ 0.0      |
| L929 cells + $\text{Cu}^{2+}$ (0.165 $\mu\text{M}$ ) | 0.165                                   | 94.5 $\pm$ 14.0 | 5.5 $\pm$ 14.0     |
| L929 cells + $\text{Cu}^{2+}$                        | 0.33                                    | 96.2 $\pm$ 8.3  | 3.8 $\pm$ 8.3      |
| L929 cells + $\text{Cu}^{2+}$                        | 0.66                                    | 99.8 $\pm$ 2.2  | 0.2 $\pm$ 2.2      |
| L929 cells + $\text{Cu}^{2+}$                        | 1.65                                    | 98.7 $\pm$ 9.9  | 1.3 $\pm$ 9.9      |
| L929 cells + $\text{Cu}^{2+}$                        | 3.3                                     | 71.6 $\pm$ 2.8  | 28.4 $\pm$ 2.8     |
| L929 cells + $\text{Cu}^{2+}$                        | 6.6                                     | 73.0 $\pm$ 8.6  | 27.0 $\pm$ 8.6     |

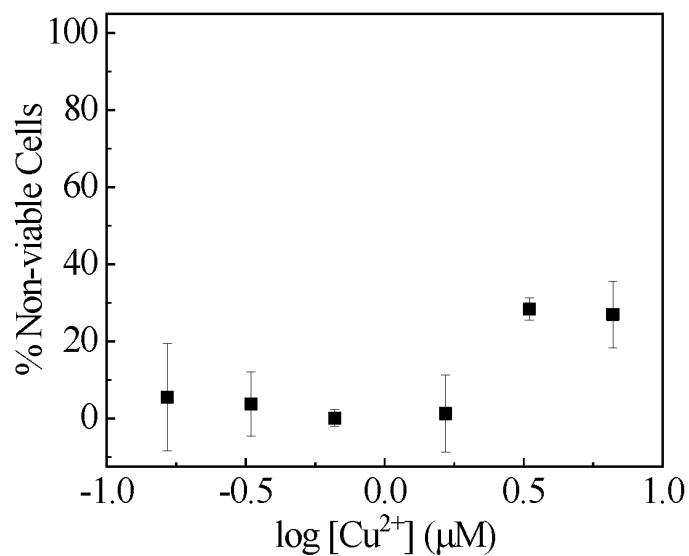

**Figure S17.** Graph of L929 cell viability with respect to dissolved copper concentration.



**Table S15.** Effect of CuO nanoparticle leachate after removal of dissolved Cu ions ( $^1\text{CuO}$ ; 0.6 – 12.0 mM) on L929 cell viability after 24 h.

| Contents                             | $^1\text{CuO}$<br>(mM) | % Viable Cells | % Non-viable Cells |
|--------------------------------------|------------------------|----------------|--------------------|
| L929 cells                           | 0                      | 100.0 ± 0.0    | 0.0 ± 0.0          |
| L929 cells + $^1\text{CuO}$ (0.6 mM) | 0.6                    | 89.1 ± 0.3     | 10.9 ± 0.3         |
| L929 cells + $^1\text{CuO}$          | 1.2                    | 85.7 ± 2.1     | 14.3 ± 2.1         |
| L929 cells + $^1\text{CuO}$          | 1.5                    | 69.4 ± 8.6     | 30.6 ± 8.6         |
| L929 cells + $^1\text{CuO}$          | 2.4                    | 84.4 ± 6.2     | 15.6 ± 6.2         |
| L929 cells + $^1\text{CuO}$          | 3.0                    | 90.4 ± 5.7     | 9.6 ± 5.7          |
| L929 cells + $^1\text{CuO}$          | 4.8                    | 85.5 ± 5.1     | 14.5 ± 5.1         |
| L929 cells + $^1\text{CuO}$          | 6.0                    | 79.4 ± 1.6     | 20.6 ± 1.6         |
| L929 cells + $^1\text{CuO}$          | 9.0                    | 89.2 ± 0.3     | 10.8 ± 0.3         |
| L929 cells + $^1\text{CuO}$          | 12.0                   | 73.4 ± 5.2     | 26.6 ± 5.2         |

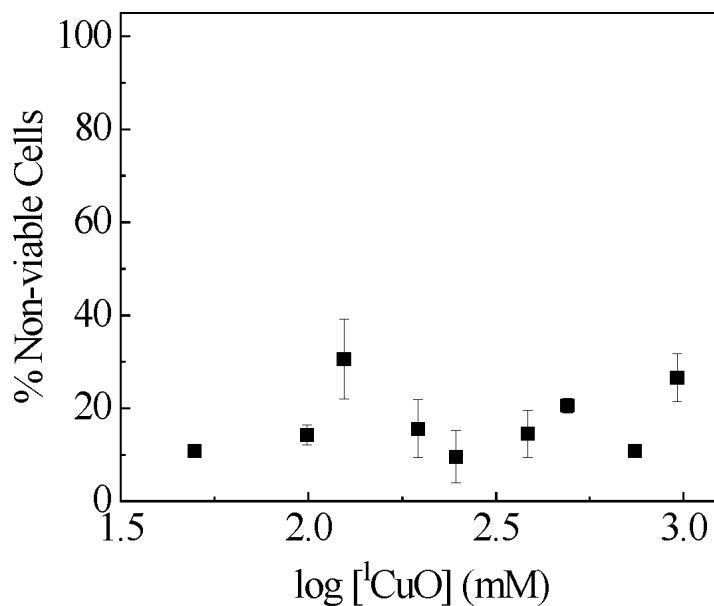

**Figure S18.** Graph of L929 cell viability with respect to CuO nanoparticle leachate concentration.

**Table S16.** Effect of H<sub>2</sub>O<sub>2</sub> (50 - 2500 μM) on L929 cell viability after 24 h.

| Contents                                           | [H <sub>2</sub> O <sub>2</sub> ]<br>(μM) | % Viable Cells | % Non-viable Cells |
|----------------------------------------------------|------------------------------------------|----------------|--------------------|
| L929 cells                                         | 0                                        | 100.0 ± 0.0    | 0.0 ± 0.0          |
| L929 cells + H <sub>2</sub> O <sub>2</sub> (50 μM) | 50                                       | 93.4 ± 3.7     | 6.6 ± 3.7          |
| L929 cells + H <sub>2</sub> O <sub>2</sub>         | 100                                      | 83.7 ± 12.3    | 16.3 ± 12.3        |
| L929 cells + H <sub>2</sub> O <sub>2</sub>         | 200                                      | 17.9 ± 17.9    | 82.1 ± 17.9        |
| L929 cells + H <sub>2</sub> O <sub>2</sub>         | 400                                      | 9.2 ± 8.0      | 90.8 ± 8.0         |
| L929 cells + H <sub>2</sub> O <sub>2</sub>         | 500                                      | 7.3 ± 7.1      | 92.7 ± 7.1         |
| L929 cells + H <sub>2</sub> O <sub>2</sub>         | 1000                                     | 5.5 ± 2.5      | 94.5 ± 2.5         |
| L929 cells + H <sub>2</sub> O <sub>2</sub>         | 2000                                     | 5.1 ± 4.8      | 94.9 ± 4.8         |
| L929 cells + H <sub>2</sub> O <sub>2</sub>         | 2500                                     | 0.7 ± 0.8      | 99.3 ± 0.8         |

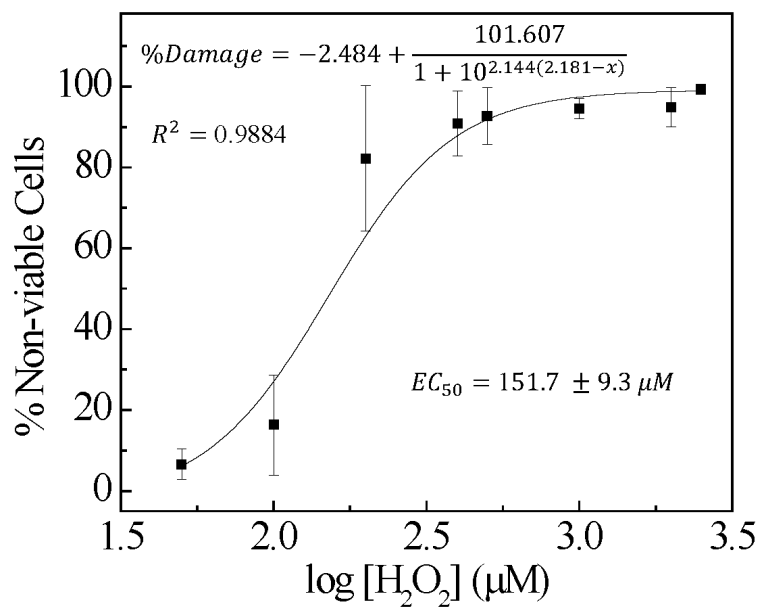

**Figure S19.** Graph of L929 cell viability with respect to H<sub>2</sub>O<sub>2</sub> concentration showing the best-fit, sigmoidal EC<sub>50</sub> curve.

**Table S17.** Effect of  $^{NP}CuO$  (62.5  $\mu M$ ) and  $H_2O_2$  (50 - 2500  $\mu M$ ) on L929 cell viability after 24 h.

| Contents                                         | $[H_2O_2]$<br>( $\mu M$ ) | % Viable Cells  | % Non-viable Cells |
|--------------------------------------------------|---------------------------|-----------------|--------------------|
| L929 cells                                       | 0                         | 100.0 $\pm$ 0.0 | 0.0 $\pm$ 0.0      |
| L929 cells + $H_2O_2$ (50 $\mu M$ )              | 50                        | 93.4 $\pm$ 3.7  | 6.6 $\pm$ 3.7      |
| L929 cells + $^{NP}CuO$ (62.5 $\mu M$ )          | 0                         | 94.7 $\pm$ 9.0  | 5.3 $\pm$ 9.0      |
| L929 cells + $^{NP}CuO$ + $H_2O_2$ (50 $\mu M$ ) | 50                        | 12.9 $\pm$ 9.4  | 87.1 $\pm$ 9.4     |
| L929 cells + $^{NP}CuO$ + $H_2O_2$               | 100                       | 11.3 $\pm$ 4.7  | 88.7 $\pm$ 4.7     |
| L929 cells + $^{NP}CuO$ + $H_2O_2$               | 200                       | 3.0 $\pm$ 1.6   | 97.0 $\pm$ 1.6     |
| L929 cells + $^{NP}CuO$ + $H_2O_2$               | 400                       | 3.7 $\pm$ 1.6   | 96.3 $\pm$ 1.6     |
| L929 cells + $^{NP}CuO$ + $H_2O_2$               | 500                       | 0.3 $\pm$ 0.4   | 99.7 $\pm$ 0.4     |
| L929 cells + $^{NP}CuO$ + $H_2O_2$               | 1000                      | 1.7 $\pm$ 2.6   | 98.3 $\pm$ 2.6     |
| L929 cells + $^{NP}CuO$ + $H_2O_2$               | 2000                      | 2.1 $\pm$ 0.6   | 97.9 $\pm$ 0.6     |
| L929 cells + $^{NP}CuO$ + $H_2O_2$               | 2500                      | 2.2 $\pm$ 0.9   | 97.8 $\pm$ 0.9     |

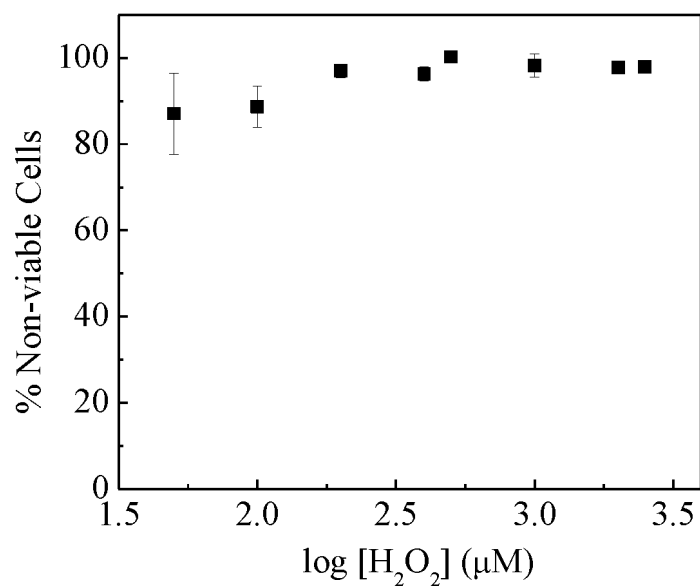

**Figure S20.** Graph of L929 cell viability with respect to  $H_2O_2$  concentration in the presence of  $^{NP}CuO/H_2O_2$ .

**Table S18.** Effect of methyl-3,4-dihydroxybenzoate (MEPCA; 1.0 – 400  $\mu\text{M}$ ) with  $^{\text{NP}}\text{CuO}$  (153.5  $\mu\text{M}$ ) and  $\text{H}_2\text{O}_2$  (80  $\mu\text{M}$ ) on L929 cell viability after 24 h.

| Contents                                                                                                  | [MEPCA] ( $\mu\text{M}$ ) | % Viable Cells  | % Non-viable Cells |
|-----------------------------------------------------------------------------------------------------------|---------------------------|-----------------|--------------------|
| L929 cells                                                                                                | 0                         | 100.0 $\pm$ 0.0 | 0.0 $\pm$ 0.0      |
| L929 cells + $\text{H}_2\text{O}_2$ (80 $\mu\text{M}$ )                                                   | 0                         | 53.9 $\pm$ 5.8  | 46.1 $\pm$ 5.8     |
| L929 cells + MEPCA (400 $\mu\text{M}$ )                                                                   | 400                       | 67.0 $\pm$ 12.7 | 33.0 $\pm$ 12.7    |
| L929 cells + $^{\text{NP}}\text{CuO}$ (153.5 $\mu\text{M}$ ) + $\text{H}_2\text{O}_2$ (80 $\mu\text{M}$ ) | 0                         | 17.3 $\pm$ 0.6  | 82.7 $\pm$ 0.6     |
| L929 cells + MEPCA + $^{\text{NP}}\text{CuO}$ + $\text{H}_2\text{O}_2$                                    | 1                         | 80.6 $\pm$ 7.4  | 19.4 $\pm$ 7.4     |
| L929 cells + MEPCA + $^{\text{NP}}\text{CuO}$ + $\text{H}_2\text{O}_2$                                    | 10                        | 61.7 $\pm$ 4.8  | 38.3 $\pm$ 4.8     |
| L929 cells + MEPCA + $^{\text{NP}}\text{CuO}$ + $\text{H}_2\text{O}_2$                                    | 50                        | 31.7 $\pm$ 4.2  | 68.3 $\pm$ 4.2     |
| L929 cells + MEPCA + $^{\text{NP}}\text{CuO}$ + $\text{H}_2\text{O}_2$                                    | 100                       | 26.2 $\pm$ 8.7  | 73.8 $\pm$ 8.7     |
| L929 cells + MEPCA + $^{\text{NP}}\text{CuO}$ + $\text{H}_2\text{O}_2$                                    | 200                       | 17.9 $\pm$ 5.0  | 82.1 $\pm$ 5.0     |
| L929 cells + MEPCA + $^{\text{NP}}\text{CuO}$ + $\text{H}_2\text{O}_2$                                    | 400                       | 13.7 $\pm$ 0.3  | 86.3 $\pm$ 0.3     |

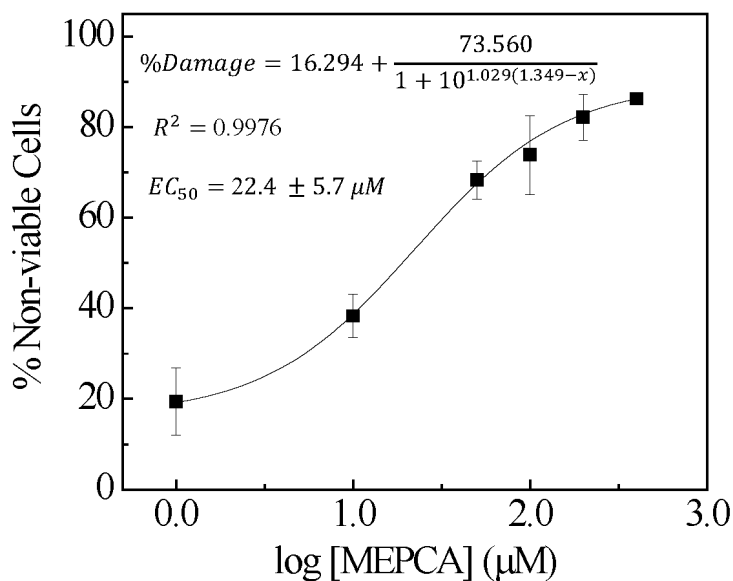

**Figure S21.** Graph of L929 cell viability with respect to MEPCA concentration in the presence of  $^{\text{NP}}\text{CuO}/\text{H}_2\text{O}_2$ .

**Table S19.** L929 cell damage inhibition by methyl-3,4,5-trihydroxybenzoate (MEGA; 1.0 – 400.0  $\mu\text{M}$ ) with  $^{\text{NP}}\text{CuO}$  (153.5  $\mu\text{M}$ ) and  $\text{H}_2\text{O}_2$  (80  $\mu\text{M}$ ) after 24 h.

| Contents                                                                                                  | [MEGA] ( $\mu\text{M}$ ) | % Viable Cells  | % Non-viable Cells |
|-----------------------------------------------------------------------------------------------------------|--------------------------|-----------------|--------------------|
| L929 cells                                                                                                | 0                        | 100.0 $\pm$ 0.0 | 0.0 $\pm$ 0.0      |
| L929 cells + $\text{H}_2\text{O}_2$ (80 $\mu\text{M}$ )                                                   | 0                        | 53.9 $\pm$ 5.8  | 46.1 $\pm$ 5.8     |
| L929 cells + MEGA (400 $\mu\text{M}$ )                                                                    | 400                      | 39.7 $\pm$ 12.6 | 60.3 $\pm$ 12.6    |
| L929 cells + $^{\text{NP}}\text{CuO}$ (153.5 $\mu\text{M}$ ) + $\text{H}_2\text{O}_2$ (80 $\mu\text{M}$ ) | 0                        | 17.3 $\pm$ 0.6  | 82.7 $\pm$ 0.6     |
| L929 cells + MEGA + $^{\text{NP}}\text{CuO}$ + $\text{H}_2\text{O}_2$                                     | 1                        | 70.6 $\pm$ 7.5  | 29.4 $\pm$ 7.5     |
| L929 cells + MEGA + $^{\text{NP}}\text{CuO}$ + $\text{H}_2\text{O}_2$                                     | 10                       | 62.4 $\pm$ 0.5  | 37.6 $\pm$ 0.5     |
| L929 cells + MEGA + $^{\text{NP}}\text{CuO}$ + $\text{H}_2\text{O}_2$                                     | 50                       | 33.0 $\pm$ 7.5  | 67.0 $\pm$ 7.5     |
| L929 cells + MEGA + $^{\text{NP}}\text{CuO}$ + $\text{H}_2\text{O}_2$                                     | 100                      | 38.3 $\pm$ 6.3  | 61.7 $\pm$ 6.3     |
| L929 cells + MEGA + $^{\text{NP}}\text{CuO}$ + $\text{H}_2\text{O}_2$                                     | 200                      | 34.7 $\pm$ 14.5 | 65.3 $\pm$ 14.5    |
| L929 cells + MEGA + $^{\text{NP}}\text{CuO}$ + $\text{H}_2\text{O}_2$                                     | 400                      | 34.5 $\pm$ 10.9 | 65.5 $\pm$ 10.9    |

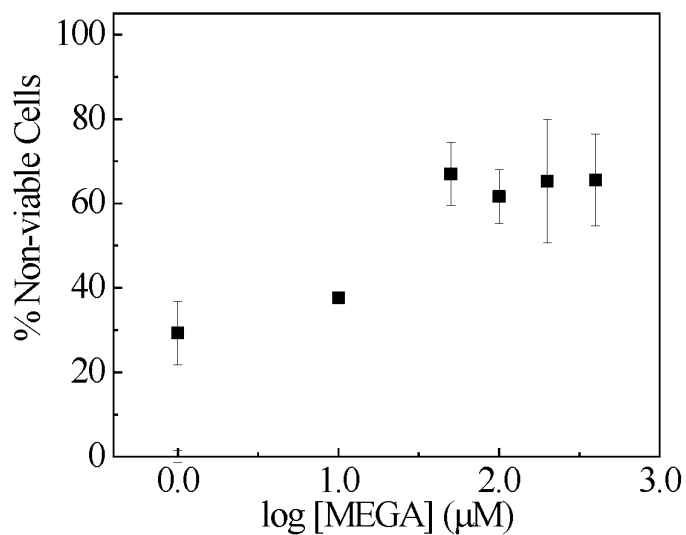

**Figure S22.** Graph of L929 cell viability with respect to MEGA concentration in the presence of  $^{\text{NP}}\text{CuO}/\text{H}_2\text{O}_2$ .
